# Supplementary material
Source: publisher figshare collection journal article supplement (https://gsajournals.figshare.com/ndownloader/files/16335233)
Supplement: Supplementary file 1 [file 16335233]

## Sheet: Supplemental Table 1
Supplemental Table 1: Genes differentially expressed by D. melanogaster in response to L-DOPA
mel	sim	sec	mel control fpkm	mel LD fpkm	mel qvalue
Acp1	GD22473	GM13384	217.67	363.767	0.00426353
Acp65Aa	GD13144	GM13861	350.337	695.189	0.00426353
Amy-d	Amy-d	Amy-d	176.007	253.912	0.00426353
Amy-p	Amy-d	Amy-p	402.203	575.234	0.0170798
AOX1	GD20338	GM25762	36.6472	51.671	0.00776781
AttA	AttA	GM21567	13.178	7.26561	0.00426353
AttB	AttB	GM21567	9.97151	2.82838	0.00426353
AttC	AttC	GM21465	16.4733	4.0165	0.00426353
Cad74A	GD12413	GM24339	4.4155	3.09513	0.0315028
CG10035	GD20576	GM26018	2.76355	0.965286	0.0111186
CG10407	GD20311	GM25738	102.86	71.1921	0.00426353
CG10513	GD18217	GM17735	95.6041	361.811	0.00426353
CG10514	GD18216	GM17734	178.564	312.517	0.00426353
CG1143	GD13700	GM14503	12.9342	19.4187	0.0445327
CG11672	GD20880	GM26358	29.5556	48.3649	0.00426353
CG11892	GD21203	GM17834	268.036	457.869	0.00426353
CG12766	GD13309	GM14028	4.23626	8.19238	0.00426353
CG12998	GD24844	GM13498	80.5972	126.488	0.00426353
CG13083	GD24211	GM17353	86.1909	45.085	0.0111186
CG13084	GD24210	GM17352	48.7922	27.8802	0.00426353
CG13323	GD25795	GM20316	249.926	393.345	0.00426353
CG13427	GD25277	GM19786	12.779	2.63874	0.00426353
CG13806	GD13674	GM14477	0.996461	2.66067	0.00776781
CG13905	GD13583	GM14365	10.1459	33.3436	0.00426353
CG14125	GD14346	GM25314	338.671	470.63	0.0111186
CG14187	GD12223	GM22251	113.899	69.111	0.00426353
CG14205	GD15573	GM22730	11.6244	5.71482	0.00426353
CG14245	GD21301	GM10341	322.177	790.861	0.00426353
CG14257	GD21323	GM10363	12.6372	19.2661	0.0170798
CG14292	GD20146	GM18675	417.25	1142.83	0.00426353
CG14309	GD20173	GM18706	65.894	38.3165	0.00426353
CG14957	GD13737	GM14544	14.4976	44.9552	0.00426353
CG15043	GD15631	GM22808	41.6694	97.5305	0.00426353
CG15155	GD24133	GM17268	110.433	160.213	0.00426353
CG15406	GD23217	GM18403	32.1852	71.0822	0.00426353
CG15533	GD21517	GM12878	1.70384	4.4492	0.00426353
CG15571	GD16309	GM12700	26.8913	12.4328	0.00426353
CG15721	GD17093	GM11593	6.34334	4.18857	0.0142654
CG15784	GD16732	GM12413	20.4849	31.1875	0.00426353
CG15818	GD23470	GM16433	25.5242	44.6612	0.00426353
CG16713	GD22735	GM18128	117.579	196.463	0.00426353
CG16956	GD22058	GM25521	5.88796	2.61088	0.0260713
CG17544	GD21764	GM17014	71.3993	51.2853	0.00776781
CG17636	GD16490	GM11114	4.16498	2.71302	0.0445327
CG17751	GD19299	GM26851	16.9644	10.0627	0.00426353
CG18547	GD20616	GM26052	14.6856	22.861	0.00426353
CG31087	GD18209	GM17726	11.3144	17.156	0.0142654
CG31106	GD21186	GM17817	9.20064	17.1217	0.00426353
CG31272	GD20707	GM26154	9.22519	17.09	0.00426353
CG31288	GD18212	GM17729	25.6118	42.6719	0.00426353
CG31324	GD21271	GM10308	35.0899	22.8045	0.00426353
CG31926	GD23100	GM16821	11.2362	3.97264	0.00426353
CG31928	GD23098	GM16818	11.8547	6.07304	0.00426353
CG32023	GD12960	GM24914	38.8929	68.8663	0.00426353
CG32557	GD15660	GM22848	4.55532	9.7965	0.00426353
CG3264	GD25138	GM15653	3.45341	7.08922	0.00426353
CG32751	GD16207	GM12589	14.7442	7.76639	0.00426353
CG3348	GD18082	GM10110	428.142	683.729	0.00426353
CG34172	GD22869	GM18260	2230.96	3233.62	0.00426353
CG34427	GD14128	GM25094	0.531651	2.99674	0.00426353
CG3597	GD22840	GM18234	37.7815	52.7851	0.0229442
CG3699	GD16445	GM19006	57.3958	85.489	0.00426353
CG4363	GD25162	GM15683	36.6558	59.9066	0.00426353
CG4377	GD25161	GM15682	38.3875	56.2227	0.0142654
CG5246	GD19144	GM15213	35.6172	24.3026	0.0111186
CG5506	GD12365	GM24296	281.118	401.205	0.00776781
CG6484	GD25462	GM19968	21.4446	32.8478	0.00426353
CG6910	GD14365	GM25333	79.2071	115.845	0.00426353
CG7017	GD12210	GM22239	0.383626	1.66333	0.0170798
CG7203	GD22471	GM13361	596.914	890.011	0.00426353
CG7542	GD14718	GM25710	51.7001	77.6379	0.00426353
CG7720	GD20151	GM18682	39.3617	61.0501	0.00426353
CG8028	GD24461	GM22749	3.5802	1.9917	0.00426353
CG8093	GD25632	GM20153	19.549	37.8708	0.00426353
CG8620	GD13998	GM14824	19.0277	62.4912	0.00426353
CG8654	GD11488	GM21988	15.4104	11.0855	0.034085
CG8665	GD24321	GM23412	3.7266	5.74541	0.00776781
CG8736	GD10155	GM20677	63.8649	105.49	0.00426353
CG9034	GD16080	GM13674	336.816	473.131	0.00776781
CG9119	GD13492	GM14230	39.9312	112.278	0.00426353
CG9360	GD15972	GM15086	32.327	50.8599	0.00426353
CG9747	GD17234	GM12172	35.6486	22.619	0.00426353
Cp15	GD14122	GM25086	1123.45	731.87	0.0229442
Cp16	Cp16	GM25088	1071.53	410.576	0.00426353
Cp18	GD14120	GM25085	922.986	304.231	0.00426353
Cp19	GD14123	GM25087	1573.28	644.423	0.00426353
Cpr49Ac	GD10873	GM21376	0.818448	2.49726	0.00426353
Cpr49Ae	GD10877	GM21380	489.591	748.219	0.00426353
Cpr49Ah	GD10883	GM21386	7.32973	12.6008	0.0170798
Cpr62Bc	GD13434	GM14163	20.4807	30.5291	0.0200135
Cpr92F	GD19366	GM23128	76.8418	111.452	0.0111186
Cyp12d1-d	GD25944	GM20476	16.6353	22.6273	0.0445327
epsilonTry	GD25907	GM20440	1174.9	854.221	0.0445327
Fbp1	GD12631	GM24558	6.69067	19.6551	0.00426353
Fcp3C	GD16341	GM18842	107.322	54.2075	0.00426353
Femcoat	GD16308	GM12699	125.805	49.2339	0.00426353
Gba1a	GD21027	GM26520	5.23847	10.8782	0.00426353
GstD10	GD20579	GM26022	4.08843	8.29718	0.00426353
GstE3	GD11371	GM21876	75.34	121.196	0.00426353
Ir7c	GD16867	GM11977	11.6005	7.23389	0.00426353
Jon66Ci	GD12995	GM24943	15.4727	8.51114	0.00426353
Listericin	GD25934	GM20465	30.9332	52.1416	0.00426353
LManVI	GD22379	GM12683	43.8701	63.9418	0.00426353
Lsp1beta	GD23056	GM16778	7.05483	12.1076	0.00426353
Lsp1gamma	Lsp1gamma	GM14308	7.57529	11.8186	0.0170798
Mal-A1	Mal-A1	Mal-A1	98.4271	195.659	0.00426353
Mal-A3	GD10167	Mal-A3	12.3071	18.6687	0.00426353
Mal-A4	GD10565	Mal-A4	18.1233	27.9189	0.00426353
Mco1	GD23601	GM17445	5.60882	8.89644	0.00426353
Mur18B	GD17434	GM22950	700.5	1599.6	0.00426353
Obp56a	Obp56a	Obp56a	109.597	150.311	0.0288331
Obp99a	Obp99a	Obp99a	241.924	416.669	0.00426353
Obp99b	Obp99b	Obp99b	99.2816	164.902	0.00426353
psd	GD22619	GM17981	59.3228	42.4198	0.00776781
RNASEK	GD17680	GM11704	219.657	329.464	0.00426353
Smvt	GD16294	GM16417	8.53397	13.2425	0.00426353
St4	GD25727	GM20241	20.966	13.0921	0.00426353
tobi	GD18201	GM17717	27.3769	54.8195	0.00426353
Uro	GD23486	GM16558	26.077	50.5234	0.00426353
Vm26Ab	GD23372	GM18584	1899.76	1384.11	0.0426812
Vm26Ac	GD22621	GM17984	97.7367	69.8707	0.0170798
Vml	GD16605	GM19220	171.159	102.401	0.00426353
Xport-A	GD20092	GM26884	59.6194	38.4134	0.0369815

## Sheet: Supplemental Table 2
Supplemental Table 2: Genes differentially expressed by D. simulans in response to L-DOPA
mel	sim	sec	sim control fpkm	sim LD fpkm	sim qvalue
CG4607	AlstR	GM17505	10.5978	15.0679	0.0448458
Amy-p	Amy-d	Amy-p	280.871	827.454	0.00291088
Amy-d	Amy-d	Amy-d	280.871	827.454	0.00291088
AttA	AttA	GM21567	2.06907	30.5738	0.00291088
AttB	AttB	GM21567	14.4588	105.234	0.00291088
AttC	AttC	GM21465	12.3097	102.855	0.00291088
CecA2	CecA1	CecA1	7.35709	52.4127	0.00291088
cid	cid	cid	5.66829	3.47151	0.00291088
Cyp6a2	Cyp6a26	GM20849	18.1433	46.0086	0.00291088
Def	Def	GM20557	604.187	1040.93	0.0225787
Dro	Dro	GM21566	39.534	102.89	0.00291088
Dsor1	Dsor1	GM22414	6.26759	3.6719	0.00291088
Prosalpha7	GD10046	GM24383	268.933	171.881	0.00291088
ced-6	GD10073	GM20601	39.0666	24.1061	0.00291088
Ance-4	GD10112	GM20639	21.9109	33.9752	0.0212631
Mal-A3	GD10167	Mal-A3	24.7973	51.9049	0.00291088
Cyp9b1	GD10274	GM20817	1.55986	3.72593	0.00951635
geminin	GD10317	GM20866	31.208	18.8217	0.00291088
Cyp6w1	GD10398	GM16536	10.5446	34.694	0.00291088
jing	GD10410	GM20879	1.41	0.946952	0.0298314
CG2065	GD10500	GM20971	37.0695	81.6517	0.00291088
Cul1	GD10516	GM20989	24.0287	16.7871	0.0323098
Mal-A2	GD10563	Mal-A2	8.55846	14.0275	0.011671
Mal-A4	GD10565	Mal-A4	42.0373	73.2331	0.00291088
PGRP-SC1a	GD10589	GM21059	213.205	308.876	0.0199536
wun2	GD10653	GM21120	22.1699	14.9794	0.00951635
CG12934	GD10749	GM21227	4.84952	10.4649	0.00291088
Prip	GD10798	GM21291	100.71	70.4251	0.0311444
CG8321	GD10833	GM21326	13.4813	9.0677	0.0274917
Den1	GD10859	GM21362	15.36	9.51426	0.00951635
CG13159	GD10869	GM21372	48.8233	0	0.00291088
CG13319	GD10931	GM21433	42.8899	28.3697	0.0053788
CG13749	GD10965	GM21080	89.582	141.142	0.00742275
Nup62	GD11188	GM21692	9.7158	6.36278	0.00742275
nopo	GD11347	GM21854	5.13693	2.93288	0.0311444
GstE11	GD11388	GM21891	100.879	67.5284	0.00951635
DptA	GD11417	GM21923	2.19788	24.4138	0.00291088
CG8654	GD11488	GM21988	21.4979	14.0116	0.00291088
RpS16	GD11679	GM15924	489.742	323.646	0.0225787
CG11796	GD12185	GM22213	288.182	479.925	0.00291088
CG14187	GD12223	GM22251	138.716	65.2838	0.00291088
Tsp74F	GD12362	GM24293	13.6394	8.96172	0.0134348
U4-U6-60K	GD12400	GM24327	6.45784	4.28254	0.00742275
Cad74A	GD12413	GM24339	4.28697	2.98709	0.0373166
Prosbeta6	GD12455	GM24382	225.844	160.666	0.0448458
gnu	GD12596	GM24526	83.9956	45.8594	0.00291088
sowah	GD12705	GM24639	2.84468	1.82865	0.0053788
viaf	GD12756	GM24686	16.5611	11.2899	0.011671
CG32066	GD12855	GM24803	5.19996	3.61856	0.0240039
CG32023	GD12960	GM24914	42.1022	96.104	0.00291088
Nelf-E	GD12975	GM24927	11.8941	8.22345	0.0459613
Prat2	GD13106	GM13811	45.0179	65.6831	0.00742275
ImpE2	GD13325	GM14048	2.62042	0.236761	0.0396514
CG12093	GD13373	GM14105	10.7599	6.85521	0.00291088
CG34056	GD13582	GM14363	1.37792	0.886161	0.00291088
Sac1	GD13597	GM14388	9.25345	6.44374	0.028687
CG16985	GD13695	GM14498	35.6094	56.7965	0.0349894
Sk2	GD13722	GM14525	16.5741	10.7427	0.00291088
CG8620	GD13998	GM14824	22.7606	57.3451	0.00291088
CG8209	GD14045	GM25009	31.2564	19.5856	0.00291088
CG13315	GD14154	GM25119	334.799	226.131	0.0323098
CG4476	GD14159	GM25123	25.6058	17.0901	0.00291088
CG14125	GD14346	GM25314	44.2264	132.639	0.00291088
Lsp2	GD14358	GM25327	14.8239	28.5266	0.00291088
CG6910	GD14365	GM25333	475.803	790.285	0.00291088
Nplp2	GD14443	GM25413	6581.16	9914.5	0.038311
Tom	GD14509	GM25490	3.67324	1.32733	0.0409748
CG13075	GD14593	GM25581	42.0628	21.0266	0.00291088
fal	GD14799	GM15021	2.57146	1.66067	0.0171377
Surf6	GD15089	GM26886	52.03	36.9344	0.0274917
Ctr1B	GD15144	GM23723	5.3393	10.8216	0.028687
Incenp	GD15339	GM20943	38.0512	25.8919	0.00742275
gammaTry	GD15391	GM20441	256.715	373.463	0.0134348
Rab35	GD15551	GM22691	8.96737	5.44775	0.00291088
CG15044	GD15632	GM22809	11.2754	6.70901	0.0134348
CG32549	GD15638	GM22819	11.3974	8.20907	0.0373166
por	GD15644	GM22821	3.88152	2.73716	0.0360487
CG32557	GD15660	GM22848	1.25525	2.5286	0.0225787
par-6	GD15678	GM13521	5.48659	3.78859	0.0171377
wus	GD15712	GM13353	16.5358	9.9228	0.00291088
CG12177	GD15879	GM17597	10.5695	6.28113	0.00291088
Usp7	GD15945	GM13227	7.79507	5.33817	0.00951635
CG9360	GD15972	GM15086	26.1885	122.125	0.00291088
Ost48	GD16081	GM13675	50.0143	36.0653	0.038311
CG12123	GD16118	GM21366	6.97581	4.37981	0.0134348
CG2233	GD16135	GM11220	372.805	551.403	0.0484257
rap	GD16281	GM12670	4.40836	2.63203	0.00291088
CG2187	GD16315	GM16419	20.296	35.2137	0.00291088
Fcp3C	GD16341	GM18842	126.915	77.1073	0.00291088
Ugt86De	GD16447	GM12089	0.753783	0	0.00291088
Vml	GD16605	GM19220	185.826	104.985	0.00291088
CG6927	GD16712	GM12373	31.1159	21.8323	0.0199536
CG6903	GD16714	GM12376	15.2862	10.5134	0.00742275
Usp16-45	GD16731	GM12411	13.1286	9.62919	0.0490392
CG4586	GD16824	GM17495	18.7198	12.5786	0.0152597
Ir7c	GD16867	GM11977	5.05037	3.09826	0.0185569
mys	GD16875	GM11222	6.66747	4.86068	0.0490392
CG10959	GD16884	GM11231	1.5915	0.938037	0.0360487
CG16892	GD16950	GM22467	11.7658	7.9069	0.00742275
CG1847	GD17053	GM13115	6.31897	4.02657	0.00742275
CG32645	GD17103	GM11604	1.18513	0.573811	0.00291088
CG11164	GD17137	GM17626	11.2353	7.77345	0.0470563
CG9747	GD17234	GM12172	30.6277	20.6014	0.0212631
CG4789	GD17309	GM13469	16.3473	8.9985	0.00291088
CG4991	GD17328	GM13485	46.3133	27.5667	0.00291088
stas	GD17353	GM13307	19.3169	12.9901	0.00291088
CG6891	GD17404	GM22913	9.6875	6.62077	0.0171377
Mur18B	GD17434	GM22950	2537.45	7975.21	0.00291088
CG14212	GD17453	GM22975	2.37638	1.6019	0.0225787
Acph-1	GD17508	GM12199	15.1659	9.64899	0.00291088
CG2310	GD17764	GM12241	65.5833	9.91498	0.00291088
stg	GD17842	GM12247	6.00594	3.93373	0.00291088
HSPC300	GD17870	GM18284	147.45	215.689	0.0490392
CG11882	GD17950	GM12259	5.43987	3.20484	0.0199536
tobi	GD18201	GM17717	29.0865	125.974	0.00291088
CG10560	GD18206	GM17724	7.95362	14.2417	0.00291088
CG31288	GD18212	GM17729	16.8059	27.6604	0.0053788
CG10514	GD18216	GM17734	103.68	161.82	0.00291088
CG10513	GD18217	GM17735	87.8168	278.624	0.00291088
CG13603	GD18331	GM23522	48.5476	34.8359	0.0323098
CG10182	GD18373	GM21442	4.3656	2.57076	0.011671
CG5278	GD18447	GM23637	0.662721	0.15316	0.0240039
fit	GD18493	GM19377	1173.67	1893.29	0.00291088
CG8223	GD18572	GM23761	86.0357	60.1112	0.0212631
osk	GD18580	GM23770	58.5842	37.3118	0.00742275
pasi2	GD18605	GM23795	5.38392	3.56253	0.0435717
phu	GD18617	GM23808	8.04041	4.18478	0.0199536
Rbp1	GD18708	GM23896	96.0597	62.8716	0.00291088
CG4757	GD18733	GM23920	3.35645	11.5251	0.00291088
CG4115	GD18814	GM24013	5.71799	0.838183	0.0152597
GstD2	GD18818	GM24018	7.04136	66.3755	0.00291088
Gnmt	GD18854	GM24056	46.7566	89.5976	0.00291088
BigH1	GD18972	GM24179	117.862	81.5151	0.0225787
CG3984	GD18988	GM24198	3.14658	6.70714	0.0053788
CG17565	GD19096	GM15154	8.69812	5.07765	0.00291088
CG14882	GD19100	GM15156	3.82294	2.10985	0.00291088
CG14883	GD19102	GM15159	1.59503	1.03543	0.0185569
CG42822	GD19156	GM15230	13.2852	21.9753	0.0225787
CG14317	GD19199	GM15274	1.30245	0	0.00291088
CG17751	GD19299	GM26851	30.297	21.6189	0.0435717
Arc42	GD19319	GM26869	27.0231	18.4346	0.00951635
Prosbeta7	GD19625	GM10644	123.327	87.752	0.038311
CG11999	GD19626	GM10645	25.8597	17.9976	0.0240039
CG9855	GD19682	GM10705	5.18195	3.1011	0.0225787
TwdlF	GD19709	GM10738	0.754572	0	0.00291088
rpk	GD19743	GM10769	57.8106	39.4259	0.0053788
CG33301	GD19842	GM17894	15.0164	42.5722	0.00291088
Sodh-2	GD19902	GM23911	9.24324	17.6801	0.00291088
CG4000	GD20044	GM23171	1305.15	2074.84	0.00291088
CG4390	GD20081	GM17704	54.7244	31.1586	0.00291088
CG6300	GD20102	GM26862	1.73438	7.02065	0.00291088
CG14292	GD20146	GM18675	861.17	1935.76	0.00291088
CG14309	GD20173	GM18706	52.2744	30.3805	0.00291088
l(3)05822	GD20184	GM15306	12.8822	9.17743	0.0409748
mTerf5	GD20194	GM15317	10.5441	7.32321	0.0311444
CG31262	GD20243	GM15377	6.21017	4.28028	0.0152597
AOX1	GD20338	GM25762	42.125	72.838	0.00291088
CG6912	GD20382	GM25806	2.22046	5.0679	0.00291088
CG17327	GD20527	GM25967	30.9142	21.3737	0.028687
Ugt86Dd	GD20686	GM26133	40.3661	66.4596	0.00291088
CG31272	GD20707	GM26154	6.90237	11.5284	0.00742275
CG12945	GD20760	GM26210	4.70097	3.25235	0.0360487
CG12948	GD20764	GM26219	9.21118	6.11156	0.00951635
RagA-B	GD20832	GM26296	14.2571	9.60897	0.0199536
Root	GD21065	GM26558	4.99155	2.84912	0.00291088
Trf4-2	GD21148	GM17777	11.363	7.73014	0.0424157
CG11889	GD21200	GM17829	39.1767	102.462	0.00291088
CG11892	GD21203	GM17834	124.842	236.615	0.00291088
CG5107	GD21222	GM10249	498.654	769.114	0.0053788
CG31091	GD21246	GM10276	7.64121	3.89579	0.00291088
CG42235	GD21250	GM10281	15.5286	22.4548	0.0212631
CG14245	GD21301	GM10341	37.9836	127.155	0.00291088
CG5500	GD21312	GM10350	15.5481	10.7173	0.0360487
CG15533	GD21517	GM12878	29.391	49.1497	0.00291088
fon	GD21766	GM17016	115.403	162.513	0.0240039
gammaTub37C	GD21771	GM17021	19.9011	12.7857	0.00291088
CG6583	GD22126	GM26284	12.1331	7.28723	0.00291088
borr	GD22362	GM12517	17.3277	11.255	0.0053788
LManVI	GD22379	GM12683	6.32492	21.3392	0.00291088
CG5149	GD22498	GM13572	17.5665	12.7843	0.0490392
Sec61alpha	GD22572	GM17934	118.219	83.0263	0.038311
psd	GD22619	GM17981	109.969	69.2051	0.00291088
Vm26Aa	GD22620	GM17983	15221.7	9990.31	0.0053788
Vm26Ac	GD22621	GM17984	207.582	104.494	0.00291088
CG8892	GD22670	GM18050	8.58008	5.22661	0.00291088
mRpL24	GD22680	GM18061	37.786	26.7352	0.0396514
lectin-24A	GD22727	GM18119	23.8647	61.0585	0.00291088
Mad	GD22774	GM18164	6.59984	4.65964	0.0212631
Cyp309a2	GD22825	GM18218	5.54938	13.8935	0.00291088
CG3609	GD22839	GM18233	175.804	372.021	0.00291088
CG3597	GD22840	GM18234	94.8123	132.891	0.0470563
CG34172	GD22869	GM18260	1238.88	1778.49	0.0240039
CG4259	GD22875	GM16570	21.7666	33.4893	0.0152597
cold	GD23035	GM16753	9.79385	6.80636	0.028687
Send2	GD23142	GM18244	2.09852	5.59065	0.00291088
gkt	GD23212	GM18399	5.39627	3.31548	0.00291088
CG15406	GD23217	GM18403	38.8338	74.1897	0.00291088
CG17593	GD23238	GM18418	36.4045	25.2377	0.0152597
Vm26Ab	GD23372	GM18584	1264.68	726.802	0.00291088
CG9505	GD23405	GM18623	25.4565	43.891	0.00291088
CG11236	GD23432	GM16217	25.5755	37.4198	0.0349894
Glt	GD23558	GM17098	22.1981	32.4169	0.0298314
CG13113	GD23613	GM17532	10.7751	6.24921	0.00291088
Nse4	GD23706	GM18438	1.08558	0.603351	0.00291088
Lrr47	GD23713	GM18513	3.18626	1.77399	0.00291088
CG14915	GD23758	GM18840	2.52242	0	0.00291088
CG14931	GD23788	GM19192	9.75653	6.11912	0.00291088
Phae2	GD23820	GM26739	89.0365	131.699	0.00742275
Pect	GD23872	GM10235	13.951	8.6391	0.0459613
CG31813	GD23916	GM15146	3.73921	0	0.00291088
CG4278	GD24053	GM18668	6.95398	4.26815	0.0199536
CG15155	GD24133	GM17268	40.5578	80.516	0.00291088
lok	GD24241	GM17387	29.5224	18.3204	0.0053788
Mcm10	GD24309	GM23399	12.8681	8.12183	0.00291088
CG8665	GD24321	GM23412	6.82339	11.7135	0.00291088
vap	GD24496	GM11672	8.42379	5.81304	0.0212631
Ran	GD24539	GM11261	113.906	76.8543	0.0212631
O-fut2	GD24636	GM18972	17.8911	11.2854	0.00951635
csw	GD24731	GM19198	3.64662	2.54279	0.0199536
CG10332	GD25030	GM15525	1.85276	10.3451	0.00291088
Rrp4	GD25033	GM15529	84.2904	56.6929	0.0134348
CG30413	GD25061	GM15559	0.574538	0	0.00291088
CG4377	GD25161	GM15682	48.6032	81.9022	0.00291088
CG4363	GD25162	GM15683	80.9493	245.69	0.00291088
CG34040	GD25163	GM15684	1.04259	5.35938	0.00291088
CG10505	GD25211	GM15734	2.40634	8.64112	0.00291088
CG15661	GD25217	GM15739	11.0684	16.7831	0.0185569
cer	GD25324	GM19834	27.7109	19.6381	0.0298314
CG17680	GD25414	GM19925	66.4656	46.4076	0.0349894
Sardh	GD25443	GM19952	2.81757	5.33014	0.0298314
CG6484	GD25462	GM19968	10.9232	18.6547	0.00291088
CG8093	GD25632	GM20153	28.5629	42.7306	0.0199536
GPHR	GD25634	GM20156	3.17438	2.01975	0.00291088
Cyp6a18	GD25645	GM20167	8.44887	16.6863	0.00291088
St4	GD25727	GM20241	18.2557	11.5815	0.0185569
CG13323	GD25795	GM20316	1048.73	1663.25	0.00291088
Cyp12d1-d	GD25944	GM20476	1.33416	13.3441	0.00291088
loqs	loqs	GM10477	24.3682	16.8234	0.0185569
Mal-A1	Mal-A1	Mal-A1	116.965	329.44	0.00291088
mei-218	mei-218	GM13338	1.90052	1.15687	0.00291088
MtnC	MtnC	MtnC	519.101	843.119	0.00291088
Obp56e	Obp56e	Obp56e	253.182	438.571	0.00291088
otu	otu	GM21279	19.5403	13.7053	0.0185569
sala	sala	GM19072	4.61139	1.28382	0.00742275

## Sheet: Supplemental Table 3
Supplemental Table E: Genes differentially expressed by D. sechellia in response to L-DOPA
sec	mel	sim	sec control fpkm	sec LD fpkm	sec qvalue
CecA1	CecA2	CecA1	1138.48	313.729	0.00181038
cid	cid	cid	30.5003	65.7308	0.00638248
Cp110	Cp110	Cp110	7.16768	14.7715	0.0252131
DesatF	Fad2	DesatF	647.523	214.223	0.00181038
GM10110	CG3348	GD18082	351.359	126.916	0.00181038
GM10136	Cpr97Eb	GD18097	25.1902	65.1756	0.00181038
GM10142	CG6271	GD18100	4.23477	15.0813	0.015393
GM10148	CG6295	GD18105	89.1155	52.2154	0.0429336
GM10156	Ets97D	GD18111	18.2079	37.0461	0.00730275
GM10162	ball	GD18116	44.5685	88.1826	0.00830907
GM10170	CG6425	GD18122	11.6777	23.6823	0.0400719
GM10204	E(spl)m4-BFM	m4	3.87462	0	0.00303
GM10249	CG5107	GD21222	557.103	319.413	0.0461825
GM10281	CG42235	GD21250	26.9847	12.6554	0.0189064
GM10290	CG16815	GD23875	2.8382	0	0.00303
GM10322	CG5945	GD23879	198.057	82.9142	0.00181038
GM10379	DNApol-alpha73	GD15188	25.7841	48.4276	0.00830907
GM10427	Fancm	GD19428	11.6056	19.9985	0.0382434
GM10437	CG10435	GD19439	33.0513	71.9228	0.00181038
GM10499	CG7110	GD23898	19.0397	38.8576	0.00303
GM10534	Ccp84Ae	GD19530	0	3.70678	0.00181038
GM10569	Gasp	GD19561	25.8637	51.2798	0.0372553
GM10647	mtd	GD19631	44.0928	76.0062	0.0456502
GM10686	tacc	GD19661	60.9284	125.535	0.00303
GM10690	Dlip2	GD19665	36.4373	82.4913	0.00730275
GM10739	TwdlV	GD19711	0	6.09893	0.00181038
GM10767	MED31	GD19742	79.474	147.784	0.0182609
GM10827	CG12170	GD19804	52.5239	29.2219	0.0358915
GM10842	CG10979	GD19823	29.2448	54.116	0.0167012
GM10908	twr	GD19887	201.581	104.085	0.00303
GM10910	Ccp84Ag	GD19890	0	12.9708	0.00181038
GM10911	Ccp84Ad	GD16755	0	6.79592	0.00181038
GM10938	Sas-4	GD19917	12.4752	28.1078	0.00181038
GM10994	Pbp95	GD19964	7.03563	13.9552	0.0372553
GM10998	DNApol-alpha180	GD19968	13.1686	26.604	0.00303
GM11105	cana	GD23772	11.3938	20.8414	0.0160474
GM11131	CG3238	GD22755	29.4819	57.7019	0.00529379
GM11229	CG2129	GD16882	17.0434	34.4692	0.00730275
GM11302	Hmr	Hmr	3.4711	12.4606	0.00924819
GM11344	CG32695	GD24555	441.824	159.932	0.0101794
GM11352	CG3106	GD24559	91.3949	17.0404	0.00181038
GM11379	CG42797	GD16956	12.646	21.7493	0.0425233
GM11392	CG1468	GD14578	61.9822	127.12	0.00529379
GM11451	CG15203	GD16999	82.1268	168.83	0.0246972
GM11473	CG1737	GD17016	29.3995	50.5952	0.0380571
GM11488	Cp190	Cen190	33.0889	63.1409	0.030382
GM11494	Yippee	GD15888	78.2152	153.74	0.0437403
GM11521	CG7300	GD22236	7.32476	3.3615	0.0410741
GM11522	CG12716	GD15911	2.60178	19.7888	0.00181038
GM11534	CG12717	GD20914	10.1369	21.8824	0.00422274
GM11593	CG15721	GD17093	17.4912	71.9849	0.00181038
GM11667	SmB	GD22258	277.887	118.929	0.00181038
GM11735	CG5367	GD22268	26.7028	10.6005	0.0182609
GM11829	CG4563	GD24951	22.5925	6.39396	0.00181038
GM11872	CG11413	GD11870	7.16824	28.3025	0.0167012
GM11876	uri	GD11874	24.574	45.7699	0.0167012
GM11877	CG3511	GD11875	17.9571	35.4524	0.00638248
GM11977	Ir7c	GD16867	11.6752	3.27733	0.00181038
GM12060	drd	GD24816	26.1375	13.7096	0.0213882
GM12092	CG5853	GD22321	79.6107	46.1252	0.0334277
GM12147	CG5885	GD22325	371.728	204.949	0.0189064
GM12171	CG15531	GD17223	230.805	115.257	0.00303
GM12172	CG9747	GD17234	52.2741	20.758	0.00181038
GM12214	dgt1	GD17628	22.2599	38.5646	0.0456502
GM12221	CG7837	GD17666	8.31539	15.9864	0.0167012
GM12326	dgt4	EG:EG0007.10	30.5729	61.983	0.0400719
GM12456	CG6048	GD16772	194.056	79.6562	0.00181038
GM12460	MCTS1	GD16778	149.08	83.179	0.0429336
GM12462	CG5921	GD16780	14.0438	7.35401	0.0328545
GM12482	CG42240	GD24755	87.0738	158.524	0.0160474
GM12535	Atx-1	GD16817	2.35716	0	0.00181038
GM12659	CG44774	GD16269	48.2296	82.1784	0.0420603
GM12679	CG12184	GD16287	4.80839	10.929	0.00181038
GM12683	LManVI	GD22379	31.2245	8.31611	0.00181038
GM12699	Femcoat	GD16308	42.5382	136.816	0.00181038
GM12700	CG15571	GD16309	42.7749	126.563	0.00181038
GM12702	Tip60	EG:EG0007.7	17.4027	33.1839	0.0226106
GM12753	CG1951	GD21400	19.2013	34.9836	0.0160474
GM12764	CG11873	GD21411	11.1584	19.2088	0.0485901
GM12773	CG11898	GD21422	12.173	6.81147	0.0456502
GM12803	Cap-D2	GD21449	11.5464	20.6475	0.0287053
GM12810	CG18731	GD21456	103.376	217.884	0.0196261
GM12876	Fer2LCH	GD21514	904.833	2029.22	0.00303
GM12882	PH4alphaEFB	GD21521	27.3801	9.39395	0.00181038
GM12907	dj-1beta	GD21547	148.656	81.1582	0.0353058
GM12910	Cpr100A	GD15195	78.1273	195.917	0.00181038
GM12960	Peritrophin-15a	GD22405	6265.22	3043.23	0.0201678
GM13081	HP5	GD17023	23.6324	41.454	0.0328545
GM13106	CG15221	GD17047	55.6682	23.6022	0.00181038
GM13232	tsg	GD15950	2.17697	0	0.00181038
GM13285	CG17159	GD15471	55.5614	106.608	0.00422274
GM13334	xmas-2	GD15694	19.0234	39.6779	0.00303
GM13367	CG9609	GD15724	22.2213	40.4449	0.0377279
GM13371	CG9672	GD15727	49.9246	19.1902	0.0145484
GM13373	CG9673	GD15728	738.983	401.671	0.0252131
GM13375	CG32523	GD17523	151.319	73.0374	0.0111139
GM13384	Acp1	GD22473	438.662	1050.26	0.020885
GM13388	SMC3	GD15741	21.0424	37.2464	0.0256787
GM13392	CG7692	GD14702	2.39047	5.5969	0.0174455
GM13418	caz	GD17272	59.5136	34.5643	0.0481809
GM13420	CG3679	GD17274	36.8646	71.2914	0.00924819
GM13457	CG4653	GD17298	971.039	439.157	0.00181038
GM13458	CG7025	GD22481	45.3626	24.5066	0.0323596
GM13467	CG18585	GD22482	228.256	103.035	0.00181038
GM13498	CG12998	GD24844	79.9734	202.875	0.00730275
GM13644	dnk	GD19261	125.963	223.167	0.0226106
GM13674	CG9034	GD16080	1617.25	822.349	0.0269477
GM13693	e(r)	GD15793	262.061	592.753	0.00181038
GM13710	Nost	GD16922	38.1086	78.1845	0.00422274
GM13727	CG12057	GD16935	656.583	138.607	0.00181038
GM13732	CG18304	GD22530	5.98555	12.6516	0.00303
GM13761	CG8560	GD13057	342.161	107.811	0.00181038
GM13773	eco	GD13071	30.68	58.5407	0.0101794
GM13777	RhoGEF4	GD13075	17.605	31.6109	0.0400719
GM13791	Cpr65Ea	GD17593	3.40587	134.404	0.0287053
GM13811	Prat2	GD13106	167.19	87.9872	0.0129129
GM13834	ndl	GD13121	22.6783	6.98147	0.00181038
GM13861	Acp65Aa	GD13144	347.903	1061.65	0.00181038
GM13864	Cpr65Av	GD13147	0	6.39181	0.00529379
GM13896	Bre1	GD17597	29.9522	61.3678	0.00730275
GM13909	CG10592	GD13186	163.077	60.8417	0.00181038
GM13910	spo	GD13187	11.0321	3.68314	0.0189064
GM13933	CG15213	GD13214	0	252.424	0.00181038
GM13935	AkhR	GD22549	55.8218	20.9067	0.00181038
GM13953	CG13712	GD13236	4.93936	0	0.0101794
GM13954	CG15876	GD13237	6.70634	0	0.00181038
GM13995	ImpL2	ImpL2	122.474	57.1819	0.00303
GM14015	CG14995	GD13294	7.08196	15.2182	0.0382434
GM14028	CG12766	GD13309	31.7836	87.7347	0.00181038
GM14074	CG14965	GD13349	9.38536	18.6373	0.0400719
GM14087	Cht7	GD13359	1.93457	4.74337	0.0382434
GM14107	Mrtf	GD13375	10.8778	21.0398	0.00303
GM14156	dsb	GD13426	16.4738	6.82967	0.00730275
GM14163	Cpr62Bc	GD13434	6.70732	31.9368	0.00638248
GM14198	wek	GD21941	23.2574	50.0911	0.00422274
GM14213	stet	GD13475	107.98	42.9067	0.00181038
GM14227	Klp61F	GD13489	14.6566	32.4494	0.00181038
GM14230	CG9119	GD13492	161.871	389.149	0.00181038
GM14259	Vti1a	GD13516	43.6514	90.7899	0.0119711
GM14261	CG3344	GD13518	99.3335	51.8903	0.00924819
GM14287	CG15254	GD21949	569.77	316.731	0.0334277
GM14289	DIP2	GD25718	15.4903	29.1905	0.0145484
GM14290	E(bx)	GD13529	51.9658	116.023	0.00181038
GM14306	CG15255	GD21951	386.636	174.683	0.00422274
GM14310	CG6845	GD13546	8.08501	2.9453	0.0189064
GM14375	CG13912	GD13591	91.8404	23.9377	0.00181038
GM14382	LysE	GD13594	1050.84	37.3751	0.00181038
GM14432	Bro	GD13634	5.63728	0	0.00181038
GM14468	CG8960	GD13665	11.0406	0	0.00181038
GM14569	Drs	Drs	4410.82	1809.72	0.0137829
GM14585	CG32266	GD13778	0	23.082	0.00181038
GM14651	Claspin	GD13837	15.6702	37.8165	0.00181038
GM14656	slow	GD13841	9.74823	18.8504	0.043388
GM14662	CG12607	GD13846	0	4.15606	0.00181038
GM14665	CG15279	GD21984	76.2755	35.8687	0.00181038
GM14677	CG13713	GD13859	7.05836	0	0.00303
GM14680	RhoGEF64C	GD13862	13.8914	24.6366	0.0274527
GM14710	CG5150	GD13892	150.643	62.2089	0.00181038
GM14741	Jon65Aiii	GD13923	3757.99	1646.53	0.0213882
GM14770	CG7386	GD13947	6.83878	13.6541	0.0387883
GM14841	CG8562	GD14014	279.27	127.594	0.00181038
GM14909	CG3819	GD12316	190.126	62.4271	0.00181038
GM14920	CG14073	GD12326	12.3554	23.6692	0.00830907
GM14989	CG6885	GD14766	4.47448	0	0.00181038
GM14992	HipHop	GD14769	76.8134	152.134	0.0119711
GM14995	CG14074	GD14773	9.20328	21.412	0.020885
GM15027	CG16884	GD22028	22.0091	85.3359	0.00181038
GM15048	CG33306	GD22033	310.127	126.759	0.00181038
GM15052	CG33307	GD22034	153.471	62.8387	0.00181038
GM15078	Nelf-A	GD19408	17.3165	36.1587	0.00303
GM15107	r-l	GD20011	112.472	64.8202	0.0338647
GM15149	CG17930	GD19091	10.8251	4.03825	0.0323596
GM15194	CG3534	GD19126	32.0606	70.3005	0.00181038
GM15210	CG31265	GD19141	81.1591	41.647	0.0213882
GM15286	RpII33	GD23930	38.8684	70.4323	0.0348909
GM15309	CG7916	GD23932	1399.19	611.945	0.00181038
GM15330	CG7968	GD23934	109.569	62.0017	0.0470343
GM15335	CG17802	GD20209	11.0209	23.4119	0.015393
GM15415	CG10324	GD20273	9.08216	18.1647	0.0256787
GM15419	NimB1	GD23942	6.6143	1.45618	0.0309516
GM15422	CG14903	GD20280	102.277	199.093	0.0274527
GM15428	CG42232	GD20285	5.68731	16.6983	0.00181038
GM15459	hll	GD23949	8.05661	27.6913	0.00181038
GM15475	Su(z)12	GD12239	25.4646	42.4454	0.0479231
GM15515	egl	GD25020	31.91	54.1341	0.0429336
GM15522	Eglp4	GD25026	230.745	121.204	0.0252131
GM15616	Ppa	GD25110	11.5354	4.5045	0.0167012
GM15635	CG4294	GD25122	10.0934	18.0528	0.0280634
GM15643	babos	GD25132	139.739	76.6823	0.0338647
GM15649	Oatp58Db	GD15209	39.8931	19.1872	0.0312632
GM15683	CG4363	GD25162	417.904	834.481	0.00730275
GM15684	CG34040	GD25163	34.3634	189.18	0.00181038
GM15701	pirk	GD25179	59.7983	29.6626	0.0382434
GM15728	CG33655	GD25206	6.77971	0	0.00730275
GM15734	CG10505	GD25211	3.6624	7.58544	0.0312632
GM15739	CG15661	GD25217	24.5902	42.6334	0.0437403
GM15752	CG10527	GD25227	404.074	212.049	0.0167012
GM15753	Cht9	GD25228	58.8781	13.1513	0.00181038
GM15770	IM4	GD25246	4890.47	2404.5	0.0338647
GM15793	CG10543	GD11554	14.0973	25.1665	0.030382
GM15847	CG10321	GD11609	26.8743	54.8147	0.00181038
GM15878	Snp	GD11641	74.5139	125.428	0.0485901
GM15884	mei-S332	GD11646	6.8234	17.8285	0.00924819
GM15911	rad50	GD11670	17.5908	33.2441	0.0160474
GM16005	CG15263	GD24001	3.14339	57.1343	0.00181038
GM16021	mi	GD11771	22.2072	39.9559	0.0221423
GM16040	l(2)dtl	GD11788	21.8186	38.4331	0.0380571
GM16045	CG5532	GD11795	420.476	181.826	0.00181038
GM16074	CG3065	GD11817	27.2006	47.3925	0.0479231
GM16088	Tret1-1	GD10807	130.931	68.2168	0.0400719
GM16106	CG7631	GD24016	115.019	59.4485	0.015393
GM16121	CG31601	GD21622	16.4759	37.9938	0.015393
GM16144	tsh	GD24333	1.76406	4.57922	0.0298453
GM16255	CG3430	GD23441	29.6398	60.8077	0.00529379
GM16292	Ppn	GD18032	8.79115	5.05695	0.0364277
GM16305	CG4884	GD18043	48.5391	88.8941	0.0382434
GM16309	NSD	GD18047	25.7172	55.1247	0.00181038
GM16315	CG33213	GD18052	14.19	31.1986	0.0226106
GM16399	CG9864	GD25294	32.6757	14.718	0.00529379
GM16408	heph	GD16206	31.1858	53.704	0.0358915
GM16453	Acf	GD21605	27.6011	59.2907	0.00303
GM16458	CG2003	GD21609	27.5164	14.4244	0.0405985
GM16478	CG11211	GD10332	66.5049	29.7279	0.0256787
GM16494	BubR1	GD10345	14.6757	26.0111	0.0292997
GM16495	CG7881	GD10346	70.7461	29.0638	0.00181038
GM16529	CG7882	GD10389	63.6993	35.7336	0.0226106
GM16536	Cyp6w1	GD10398	28.2045	133.537	0.00181038
GM16537	CG8343	GD10399	507.996	264.908	0.0145484
GM16558	Uro	GD23486	261.899	521.329	0.0119711
GM16572	CG42296	GD22878	3.92095	20.4923	0.00181038
GM16605	halo	GD22905	26.1015	0	0.00181038
GM16620	serp	GD12255	8.26827	17.2326	0.0262802
GM16626	Iris	GD22926	58.242	27.7463	0.00422274
GM16627	Pino	GD22927	142.575	84.5694	0.043388
GM16657	CG11835	GD22950	5.90353	12.2742	0.0213882
GM16661	Spp	GD22952	116.585	64.2312	0.0167012
GM16677	CG11911	GD22965	3358.83	1286.69	0.0101794
GM16696	CG31974	GD22985	23.1822	46.5405	0.0137829
GM16717	CG11454	GD23003	24.0518	57.1228	0.0101794
GM16722	spen	GD23007	27.6353	50.5311	0.0201678
GM16731	verm	GD12256	10.7863	25.5046	0.00303
GM16748	ush	GD23030	8.02702	15.0429	0.0262802
GM16772	kraken	GD23051	203.712	93.0879	0.00181038
GM16818	CG31928	GD23098	29.7917	106.514	0.00181038
GM16821	CG31926	GD23100	2.76023	14.8965	0.00303
GM16838	Der-1	GD23120	181.429	59.6587	0.020885
GM16854	Ssb-c31a	GD23514	338.697	595.53	0.0456502
GM16861	CG9143	GD25289	10.8819	26.9557	0.0274527
GM16947	mus201	GD23543	8.17187	19.3066	0.00181038
GM16969	barr	GD21719	13.195	29.9812	0.00181038
GM16974	Hf	Hf	125.381	60.2898	0.00303
GM17004	CG10188	GD21752	13.8023	29.316	0.00181038
GM17014	CG17544	GD21764	28.9885	13.3784	0.00303
GM17026	AsnRS	GD21774	325.609	178.709	0.0312632
GM17033	CG8786	GD12263	11.1159	22.4944	0.0495029
GM17043	CG10650	GD21791	141.715	82.7292	0.0369129
GM17044	CG15170	GD21792	7.62271	3.08336	0.0372553
GM17050	CG10621	GD21797	316.417	138.414	0.00181038
GM17052	ssp3	GD21799	11.0497	21.0824	0.015393
GM17059	CG10600	GD21806	17.8715	30.6352	0.0387883
GM17065	Irk3	GD21812	27.6813	11.5599	0.00638248
GM17098	Glt	GD23558	44.6692	89.959	0.00181038
GM17128	dl	dl	32.1977	57.8682	0.020885
GM17160	glu	GD21899	18.764	45.772	0.00181038
GM17237	CG15141	GD24108	47.4669	82.3228	0.0400719
GM17290	Grip71	GD24153	36.4473	68.3763	0.00730275
GM17343	lectin-37Db	GD24202	159.122	77.058	0.0372553
GM17351	tj	GD12036	33.0623	13.8737	0.00529379
GM17352	CG13084	GD24210	39.621	178.406	0.00181038
GM17353	CG13083	GD24211	43.7005	158.793	0.00181038
GM17369	CG13078	GD24226	88.259	13.0712	0.00181038
GM17444	ash1	GD12268	10.9907	19.6873	0.0353058
GM17502	CG14427	GD16831	6.38534	0	0.00181038
GM17532	CG13113	GD23613	23.8664	67.0682	0.00422274
GM17605	Ndc80	GD24521	13.1818	29.6613	0.0252131
GM17616	CG31086	GD21274	99.0069	34.9732	0.00181038
GM17631	Nna1	GD17141	11.8385	23.2321	0.00924819
GM17636	hoip	GD23622	1219.94	568.876	0.00181038
GM17654	CG1368	GD17154	7.04833	43.1353	0.00181038
GM17670	CG1461	GD17166	45.1322	24.7477	0.0334277
GM17674	Muc12Ea	GD17169	37.8408	162.272	0.00181038
GM17690	CG4854	GD19333	8.42701	26.1437	0.00303
GM17695	CG17633	GD23629	914.378	402.285	0.00529379
GM17717	tobi	GD18201	530.466	1030.76	0.0256787
GM17729	CG31288	GD18212	177.371	312.411	0.0382434
GM17734	CG10514	GD18216	53.791	102.84	0.0262802
GM17749	CG31510	GD18233	10.8292	19.2732	0.0309516
GM17750	CG31108	GD18234	34.1193	60.6197	0.0312632
GM17760	CG31109	GD18242	45.1787	94.1717	0.0119711
GM17761	CG6422	GD18245	42.2158	72.4916	0.0344687
GM17795	PQBP1	GD21167	24.796	61.9959	0.00181038
GM17810	CG42367	GD23641	0	4.44617	0.0377279
GM17832	CG4709	GD23643	13.1106	27.422	0.0145484
GM17897	Xrp1	GD19257	128.976	244.404	0.0145484
GM17918	twe	GD21927	50.5663	109.068	0.00181038
GM17934	Sec61alpha	GD22572	500.873	244.118	0.00730275
GM17941	CG9527	GD22578	115.744	57.9177	0.00303
GM17950	CG9497	GD22588	64.1823	35.7037	0.0196261
GM17951	Pez	GD22589	15.8531	27.089	0.0425233
GM17980	CG13992	GD22618	28.6335	12.3924	0.00303
GM17981	psd	GD22619	225.752	90.6404	0.00181038
GM17983	Vm26Aa	GD22620	9444.02	2742.91	0.00181038
GM17984	Vm26Ac	GD22621	410.549	83.8142	0.00181038
GM18013	CG14014	GD22647	4.85347	0	0.00181038
GM18028	Ncoa6	GD22656	12.8955	22.2082	0.0420603
GM18041	CG9121	GD14930	4.13003	1.09759	0.0405985
GM18099	CG17612	GD22716	12.4245	28.9517	0.00638248
GM18139	Spindly	GD22747	10.5392	23.5937	0.00181038
GM18170	GATAd	GD23678	21.251	44.7041	0.00181038
GM18218	Cyp309a2	GD22825	14.9324	30.6474	0.0137829
GM18233	CG3609	GD22839	276.725	594.191	0.00529379
GM18304	CG16786	GD15461	1.63831	4.89236	0.0226106
GM18316	CG9451	GD12277	32.4973	12.4087	0.00181038
GM18367	daw	GD23183	30.7383	12.4826	0.00303
GM18438	Nse4	GD23706	27.1997	65.7077	0.00303
GM18467	Tps1	GD23282	373.836	192.498	0.0201678
GM18486	Elba3	GD23295	10.0595	0	0.00181038
GM18500	CG3036	GD23308	86.9011	43.1333	0.00529379
GM18506	Marcal1	GD23310	10.7436	25.2404	0.00303
GM18539	Cyp28d1	GD23328	21.8965	92.9355	0.00181038
GM18573	CG7239	GD23363	15.7955	34.7334	0.00422274
GM18584	Vm26Ab	GD23372	3821.66	888.546	0.00181038
GM18631	Daxx	GD23411	16.7993	33.1967	0.00924819
GM18667	fzy	GD24052	45.041	80.2421	0.0256787
GM18706	CG14309	GD20173	93.1315	40.8365	0.00303
GM18798	Nup154	GD23750	30.3472	52.2032	0.0454163
GM18840	CG14915	GD23758	42.2921	0	0.00181038
GM18879	tko	GD16364	207.89	111.827	0.0338647
GM18917	ph-p	GD24614	8.05944	15.8219	0.0174455
GM18945	CG14818	GD16409	642.094	335.991	0.0269477
GM18949	CG14814	GD24625	44.5016	79.2178	0.0369129
GM18963	Mur2B	GD16418	11.6948	24.909	0.0119711
GM18984	CG33695	GD23773	29.8361	59.3102	0.0213882
GM19034	CG13366	GD16472	42.7064	78.6339	0.0226106
GM19044	CG32816	GD16483	1.57386	6.85716	0.0274527
GM19081	CG13367	GD16519	32.707	63.9643	0.00529379
GM19101	TRAM	GD16534	106.951	59.0012	0.0221423
GM19113	CG14629	GD16543	246.116	142.132	0.0328545
GM19127	Tsp2A	GD24713	130.254	65.1366	0.00638248
GM19202	ND-B14.5A	GD16591	883.019	509.313	0.0485901
GM19220	Vml	GD16605	512.609	143.217	0.00181038
GM19233	Seipin	GD24734	115.521	49.9989	0.00181038
GM19265	CG3939	GD16632	521.264	268.717	0.0344687
GM19583	Cpr76Bd	GD14810	4.47757	9.72844	0.0226106
GM19653	CG1840	GD17055	117.553	50.2716	0.0400719
GM19678	Lcp65Ac	GD13939	0	3.59069	0.0382434
GM19827	TBCB	GD15215	47.3151	85.0085	0.0499549
GM19914	Ote	GD25400	55.8632	105.999	0.0129129
GM19935	CG5767	GD25423	133.071	71.9113	0.0372553
GM19936	CG5773	GD25425	139.584	64.1556	0.0309516
GM19944	thr	GD25435	14.3537	33.4129	0.00181038
GM19953	sub	GD25444	30.6733	58.6626	0.0119711
GM19959	swi2	GD25450	13.1978	5.97257	0.0382434
GM19965	CG30105	GD25458	16.1756	40.8866	0.0323596
GM19968	CG6484	GD25462	78.1288	202.218	0.00181038
GM19988	CG30101	GD25483	1.96676	8.63349	0.0380571
GM20005	GstS1	GD25495	364.978	740.787	0.0145484
GM20049	CG8311	GD25530	89.5661	38.4093	0.00303
GM20076	krimp	GD15225	21.7678	43.0133	0.00422274
GM20107	CG8299	GD25584	106.593	19.5714	0.00181038
GM20140	dup	GD25618	38.2971	85.0295	0.00181038
GM20141	Pms2	GD25619	19.8273	35.9699	0.0174455
GM20157	CG8089	GD25635	9.57942	21.5502	0.00730275
GM20175	SMC2	GD25652	17.5761	35.0788	0.00422274
GM20199	Su(var)2-HP2	GD25670	9.1673	15.472	0.0481809
GM20241	St4	GD25727	80.8099	29.3291	0.00181038
GM20278	cnn	GD25761	25.2583	44.8745	0.0252131
GM20285	CG10814	GD25765	324.403	65.9316	0.00181038
GM20287	CG4734	GD25769	120.105	59.1212	0.00181038
GM20320	CG44250	GD25797	383.576	162.661	0.00181038
GM20328	CG3814	GD25805	99.1968	51.2444	0.0196261
GM20344	nemy	GD25823	55.5369	27.6398	0.0382434
GM20346	CG8785	GD25825	97.0798	31.9894	0.00181038
GM20349	muskelin	GD25828	69.2606	121.661	0.0353058
GM20396	GalT1	GD25871	23.3445	41.2777	0.0392831
GM20401	MCPH1	GD25875	26.9264	49.1635	0.0489957
GM20435	Tapdelta	GD25906	486.75	271.584	0.0292997
GM20441	gammaTry	GD15391	742.584	169.152	0.00181038
GM20442	etaTry	GD25909	58.3334	31.3182	0.0196261
GM20456	CG9062	GD25924	33.4624	57.3996	0.0410741
GM20466	CG13215	GD25935	8.01219	67.5258	0.00303
GM20469	CG13217	GD25938	0	10.3073	0.00181038
GM20476	Cyp12d1-d	GD25944	31.5113	94.9667	0.00181038
GM20484	cag	GD15259	79.931	134.697	0.043388
GM20490	CG12343	GD25952	52.2291	108.28	0.00638248
GM20498	Mat1	GD25961	39.2628	76.3997	0.0160474
GM20557	Def	Def	3500.27	1129.23	0.00181038
GM20568	CG1441	GD10039	4.90027	11.6655	0.0353058
GM20580	CG1648	GD10052	1410.9	308.98	0.00181038
GM20677	CG8736	GD10155	68.9985	188.384	0.00181038
GM20720	CG42516	GD10187	56.5973	145.444	0.00638248
GM20762	tor	GD10226	18.3633	38.005	0.00181038
GM20780	Drat	GD10242	118.238	52.9564	0.00181038
GM20781	Orc1	GD10243	21.7724	42.6078	0.00730275
GM20849	Cyp6a2	Cyp6a26	12.4549	23.1164	0.0485901
GM20884	sced	GD10414	23.4284	44.926	0.0101794
GM20943	Incenp	GD15339	42.9123	79.5368	0.0182609
GM20966	scra	GD10494	18.1199	31.7241	0.0312632
GM20971	CG2065	GD10500	17.135	57.868	0.00181038
GM21046	CG14752	GD10576	0	6.92484	0.00529379
GM21059	PGRP-SC1a	GD10589	198.723	48.9172	0.00181038
GM21061	PGRP-SC2	PGRP-SC2	754.128	378.882	0.00730275
GM21096	Su(var)2-10	GD10632	59.9373	103.197	0.0499549
GM21138	Map60	GD10668	55.4539	122.829	0.00181038
GM21166	CG30007	GD10697	10.0214	18.869	0.00924819
GM21191	Caf1-180	GD24564	27.7206	55.6899	0.00730275
GM21248	CG12942	GD15388	17.5902	33.6199	0.00924819
GM21283	iotaTry	GD15392	133.661	60.8045	0.00303
GM21301	CG12116	GD16109	710.758	372.834	0.0233042
GM21320	ADD1	GD10828	12.7624	25.8254	0.00303
GM21332	CG18343	GD10840	128.578	52.0979	0.0475062
GM21363	ana3	GD10861	9.66259	27.2216	0.00181038
GM21365	CG30047	GD10862	30.5472	16.3164	0.0174455
GM21372	CG13159	GD10869	0	7.68463	0.0262802
GM21380	Cpr49Ae	GD10877	241.62	745.402	0.00181038
GM21386	Cpr49Ah	GD10883	2.1938	26.6532	0.00924819
GM21407	Amph	GD10903	48.4607	87.5318	0.0213882
GM21436	CG13321	GD10934	374.332	202.606	0.0145484
GM21465	AttC	AttC	646.053	186.403	0.00181038
GM21468	Ser8	GD15412	186.139	85.038	0.00181038
GM21552	Asx	GD11058	8.53686	19.323	0.00181038
GM21558	Sec61beta	GD11064	1194.22	575.388	0.00422274
GM21566	Dro	Dro	10788.2	3208.04	0.00422274
GM21594	Cp7Fa	GD16900	103.236	387.561	0.00181038
GM21605	Cp7Fb	GD16901	109.583	46.9668	0.00730275
GM21609	Mtk	Mtk	7101.56	2417.74	0.0119711
GM21616	Cp7Fc	GD16903	229.913	90.6178	0.00422274
GM21649	CG8320	GD11148	109.961	61.9594	0.0456502
GM21688	Nox	GD11185	4.31863	9.34441	0.0233042
GM21726	CG5550	GD11221	146.158	43.8503	0.00181038
GM21777	Hexo2	GD16914	23.9673	12.6401	0.0323596
GM21838	CG10910	GD11332	104.377	47.3128	0.00181038
GM21842	CG5098	GD11336	13.0582	24.3556	0.0119711
GM21844	Spn55B	GD11338	57.7614	30.5876	0.0189064
GM21855	CG14500	GD11349	563.778	225.435	0.00181038
GM21866	IM2	GD11363	2620.72	690.724	0.00303
GM21871	CG16836	GD11367	971.902	438.445	0.00422274
GM21891	GstE11	GD11388	249.302	146.699	0.0456502
GM21898	CG10927	GD11395	7.45624	17.3443	0.0269477
GM21916	Mctp	GD11410	15.5791	29.3604	0.0256787
GM21918	CG15080	GD11412	0.928298	2.74081	0.0201678
GM21924	DptB	GD11418	865.141	233.42	0.00638248
GM21940	wbl	GD11437	73.0111	40.3122	0.0369129
GM21945	FK506-bp2	GD11442	1638.17	923.841	0.030382
GM21962	CG7744	GD11456	41.3377	74.4091	0.0221423
GM22037	galla-1	GD11534	90.1295	166.117	0.015393
GM22104	DNApol-eta	GD12080	14.7272	28.9912	0.00529379
GM22114	CG14568	GD12091	0	2.59093	0.00422274
GM22138	Neu2	GD12116	2.40367	0	0.00181038
GM22212	CG5199	GD12184	31.6983	56.7029	0.0364277
GM22227	DNApol-alpha60	GD12199	23.9761	53.7562	0.00181038
GM22251	CG14187	GD12223	86.4867	29.6762	0.0369129
GM22256	gig	GD14854	11.2179	19.7122	0.0274527
GM22263	Su(var)3-3	GD14861	15.8141	27.3131	0.0437403
GM22292	CG5872	GD14886	14.158	28.4987	0.0137829
GM22321	Spc105R	GD14909	6.34388	20.2424	0.00181038
GM22343	AsnS	GD14936	100.942	36.91	0.00181038
GM22355	Cpr78Cc	GD14949	3.71849	49.0037	0.0226106
GM22373	CG7519	GD14964	109.99	57.8846	0.0280634
GM22385	SMC5	GD14975	16.4027	36.1433	0.00303
GM22392	CG32444	GD14982	263.454	626.913	0.00181038
GM22402	CG14573	GD14990	0	2.77663	0.00181038
GM22448	CG11426	GD15031	66.3062	36.0667	0.0233042
GM22449	CG11425	GD15032	151.231	73.5074	0.00730275
GM22581	CG43672	GD17241	17.2455	5.98072	0.00181038
GM22630	CG33713	GD15501	211.794	124.061	0.0387883
GM22649	CG1304	GD15519	322.788	187.541	0.0382434
GM22730	CG14205	GD15573	4.00101	0.808223	0.0256787
GM22735	Tao	GD15575	92.2632	227.137	0.00181038
GM22755	CG7992	GD15589	43.0533	16.1024	0.0201678
GM22756	CG14196	GD15591	34.1311	17.239	0.0167012
GM22758	CG14195	GD15593	8.08486	3.25815	0.0328545
GM22760	Ulp1	GD15595	88.0123	180.732	0.0129129
GM22848	CG32557	GD15660	6.61603	13.9966	0.0213882
GM22913	CG6891	GD17404	135.416	72.8874	0.030382
GM23054	Npc1b	GD17503	76.6719	29.8724	0.00181038
GM23130	CG31205	GD19368	105.809	35.1778	0.00181038
GM23132	Cdk2	GD19371	42.4442	72.2085	0.0489957
GM23182	EloB	GD20055	188.797	332.79	0.0470343
GM23283	CG33511	GD21660	2.3193	7.45953	0.0405985
GM23287	CG9265	GD21662	8.88287	19.3614	0.0348909
GM23307	CG6013	GD19268	33.774	75.9588	0.00422274
GM23449	CycB3	GD18256	65.9378	130.646	0.00924819
GM23476	CG13625	GD18284	21.6747	39.5104	0.0160474
GM23477	REPTOR	GD18285	23.2163	44.0021	0.00730275
GM23503	jnj	GD18313	15.8484	37.1674	0.00181038
GM23513	CG13607	GD18323	67.8225	23.6169	0.00181038
GM23535	eIF4G2	GD18348	15.9241	28.5716	0.0213882
GM23580	Rad60	GD18396	30.2577	53.9737	0.0323596
GM23591	CG31365	GD18405	17.3825	31.3519	0.0201678
GM23597	CG17119	GD18410	46.1673	21.3808	0.00830907
GM23619	Dcr-1	Dcr-1	7.34802	13.1964	0.0292997
GM23622	CG4813	GD18432	21.1768	40.9125	0.0189064
GM23685	CG11723	GD22872	19.9305	37.1509	0.0382434
GM23701	CG7910	GD18511	148.652	85.8314	0.0420603
GM23713	Mcm2	GD18528	43.2109	75.7094	0.0353058
GM23723	Ctr1B	GD15144	790.501	158.515	0.00181038
GM23738	CG31454	GD18547	8.6579	2.40567	0.0201678
GM23740	CG15382	GD23135	24.6673	0	0.00181038
GM23754	CG8116	GD18565	138.417	264.859	0.0182609
GM23767	hng2	GD18578	12.6093	32.7811	0.00730275
GM23796	CG43675	GD18606	72.5154	126.265	0.0312632
GM23798	CG8129	GD18609	18.7841	7.24067	0.00830907
GM23819	CG8301	GD18629	19.0198	36.3449	0.0145484
GM23823	SpdS	GD18634	200.371	103.787	0.0111139
GM23846	eloF	GD18654	439.483	205.091	0.00730275
GM23863	ATPsynepsilonL	GD18671	37.5654	0	0.00181038
GM23868	CG12420	GD18675	2.72645	0	0.00181038
GM23879	jumu	GD18690	22.4146	39.4568	0.030382
GM23882	mthl11	GD18692	2.41766	0	0.00181038
GM23920	CG4757	GD18733	112.674	47.5284	0.00529379
GM23957	CG14710	GD18767	17.4141	38.5005	0.00529379
GM23961	CG14712	GD18770	16.9719	28.8244	0.0437403
GM24053	Dtg	GD18852	4.25383	1.14386	0.0470343
GM24056	Gnmt	GD18854	74.0594	263.652	0.00181038
GM24070	Paip2	GD18867	130.447	268.694	0.00529379
GM24085	sim	GD18883	4.9852	14.3827	0.00181038
GM24093	Su(var)3-7	GD18892	34.4828	65.9794	0.0111139
GM24097	CG8773	GD18895	50.2507	27.3134	0.0174455
GM24146	Cyp6d5	GD18941	87.0197	215.662	0.00181038
GM24294	CG16775	GD12364	84.0181	26.362	0.00181038
GM24297	CG5535	GD12366	123.139	56.9876	0.00181038
GM24333	CG33052	GD12406	30.2387	54.5406	0.0400719
GM24343	CG6479	GD12417	27.342	58.6866	0.00181038
GM24370	PGRP-SB1	PGRP-SB1	326.565	146.831	0.0213882
GM24371	CG13026	GD12446	25.0179	73.6293	0.00830907
GM24376	zetaCOP	GD12449	223.21	122.478	0.020885
GM24420	CG13044	GD12490	0	4.25132	0.00181038
GM24424	CG13047	GD12495	0	5.81352	0.00181038
GM24453	CG5830	GD12523	27.1425	49.3851	0.0377279
GM24489	CG13454	GD12560	6.76058	0	0.00303
GM24502	CG12316	GD12573	14.3623	26.0273	0.0213882
GM24507	Plp	GD12579	8.72085	18.9624	0.00303
GM24527	NHP2	GD12597	276.236	143.026	0.0160474
GM24530	mop	GD12600	29.6117	52.6892	0.0274527
GM24539	RecQ5	GD12613	19.7215	41.2849	0.00181038
GM24548	stwl	GD17574	18.5092	45.1839	0.00181038
GM24550	CG3868	GD12622	201.669	80.5709	0.00181038
GM24564	Ptip	GD12637	12.1763	26.1393	0.00181038
GM24572	CG8833	GD12644	12.0043	22.6804	0.0145484
GM24583	CG10710	GD12652	1.92621	5.74522	0.0252131
GM24647	sti	GD12711	13.1713	22.7187	0.0410741
GM24773	CG40191	GD15142	117.144	205.968	0.0364277
GM24806	CG43127	GD12859	56.9336	22.6742	0.00181038
GM24839	Ilp4	GD12891	7.15941	0	0.00181038
GM24841	Zasp67	GD12893	6.69671	16.5209	0.00730275
GM24863	path	GD12915	495.508	221.493	0.00181038
GM24870	phol	GD12921	26.1044	46.0217	0.0348909
GM24879	CG4080	GD12929	23.4598	39.2629	0.0481809
GM24884	Klp67A	GD12936	19.7085	34.9628	0.0420603
GM24900	CG5644	GD12950	19.0534	8.03674	0.0213882
GM24914	CG32023	GD12960	41.4288	315.873	0.00181038
GM24968	CG13676	GD13017	2.08764	5.74878	0.0233042
GM24969	CG7504	GD13018	11.4674	19.9333	0.0429336
GM25087	Cp19	GD14123	982.867	2161.06	0.0420603
GM25119	CG13315	GD14154	22444.4	11215.2	0.0372553
GM25123	CG4476	GD14159	6.72609	1.40862	0.0262802
GM25232	Cpr67Fa1	GD14266	0	14.8196	0.00181038
GM25236	CG14147	GD14270	0	6.24165	0.00181038
GM25299	Klp68D	GD14330	17.4785	31.3285	0.0226106
GM25301	RpL10Ab	GD14333	4235.63	1996.43	0.0380571
GM25314	CG14125	GD14346	80.8342	345.476	0.00181038
GM25333	CG6910	GD14365	50.4052	138.285	0.00181038
GM25414	SNCF	GD14444	31.9423	0	0.00181038
GM25415	CG14111	GD14445	2.68886	0	0.00181038
GM25421	cmb	GD14451	16.4813	29.8301	0.0196261
GM25445	upSET	GD14471	12.3736	21.1497	0.0400719
GM25490	Tom	GD14509	4.61487	0	0.00181038
GM25508	Cep135	GD14526	5.02643	13.1905	0.0167012
GM25530	Z600	GD14545	93.5647	0	0.00181038
GM25533	gdl	GD14548	22.8963	55.2116	0.00529379
GM25576	CG9293	GD22064	19.3133	54.8512	0.00181038
GM25580	Mbs	GD14592	21.8755	38.0901	0.0398665
GM25590	SsRbeta	GD14599	393.906	216.115	0.0167012
GM25591	elg1	GD14600	23.209	43.9896	0.00830907
GM25634	RAF2	GD14638	20.4586	39.1257	0.0129129
GM25681	Fit2	GD14686	12.4256	23.5726	0.0246972
GM25682	CG7730	GD14687	20.0132	35.3265	0.0456502
GM25703	CG34250	GD14710	201.965	656.316	0.0256787
GM25706	edin	GD14712	317.049	85.0071	0.00181038
GM25710	CG7542	GD14718	271.767	99.7172	0.00181038
GM25727	CG6126	GD20304	43.4066	23.3149	0.0274527
GM25738	CG10407	GD20311	152.46	76.2776	0.0240232
GM25763	CG31296	GD20339	4.13553	13.5851	0.0448764
GM25771	CG6125	GD15099	35.5854	20.8981	0.0481809
GM25788	MRG15	GD20365	31.6939	57.3146	0.0240232
GM25799	CG6654	GD20376	9.64856	21.2484	0.00303
GM25801	CG16972	GD22080	11.0758	20.8587	0.00830907
GM25803	CG6752	GD20379	3.17152	6.15855	0.0489957
GM25815	RpS5b	GD20391	2011.05	1037.34	0.0481809
GM25877	CG9928	GD22088	1200.18	2712.44	0.0111139
GM25896	CG9926	GD20466	33.875	65.5322	0.0182609
GM25958	CG8483	GD20518	2.95752	8.99416	0.0323596
GM25990	kar	GD20550	77.4899	34.1267	0.00181038
GM26018	CG10035	GD20576	16.7639	1.54066	0.0226106
GM26077	Blm	GD20640	16.5177	29.3298	0.0252131
GM26091	CG6791	GD20654	16.3875	27.888	0.0410741
GM26096	PGRP-LB	GD15111	67.1801	35.5696	0.0380571
GM26097	sals	GD20658	16.2511	29.5392	0.0189064
GM26133	Ugt86Dd	GD20686	29.7559	69.2883	0.00181038
GM26189	Npc2d	GD20738	600.868	207.431	0.00181038
GM26195	Mical	GD20744	18.0339	33.2489	0.020885
GM26198	CG5359	GD20745	16.9866	38.9561	0.0392831
GM26204	CG9458	GD20751	66.3406	31.7315	0.0298453
GM26235	Scm	GD20776	27.1157	45.5546	0.0448764
GM26238	bocks	GD20779	30.4283	67.7362	0.00181038
GM26243	CG9396	GD20783	271.865	129.142	0.00529379
GM26269	CG16749	GD20806	881.795	400.731	0.00181038
GM26287	Nmdmc	GD20823	116.408	54.7978	0.00422274
GM26290	CG11985	GD20826	292.226	580.916	0.0328545
GM26294	E(var)3-9	anon-EST:fe1E9	36.6427	74.1189	0.00303
GM26363	CG9636	GD20885	16.9749	32.899	0.0160474
GM26364	Ada2b	GD20886	48.1032	85.0856	0.0246972
GM26400	CG5791	GD15173	544.017	99.4864	0.00181038
GM26411	CG7084	GD20931	52.4049	20.1478	0.00181038
GM26437	Pebp1	GD20954	2896.05	1317.42	0.0189064
GM26512	GILT2	GD21021	175.959	90.2163	0.0119711
GM26524	CG10300	GD21032	13.8789	4.38321	0.0269477
GM26530	Lsd-1	GD21037	222.121	70.7115	0.00181038
GM26555	SMC1	GD21062	19.8034	34.6815	0.0287053
GM26558	Root	GD21065	10.0718	0.407108	0.00181038
GM26581	Orct	GD21083	34.8511	16.5871	0.0129129
GM26609	ana1	GD21108	9.04528	23.0117	0.00181038
GM26622	asp	GD21126	20.8608	44.3437	0.00529379
GM26698	dmGlut	GD23809	136.845	68.8703	0.0201678
GM26738	Phae1	GD23819	67.1187	23.8388	0.00181038
GM26775	mav	GD15474	47.0803	90.2177	0.00924819
GM26780	bip2	GD15475	53.4445	110.258	0.00303
GM26790	RhoGAP102A	GD15476	1.68332	4.93429	0.0252131
GM26804	Eph	GD24409	63.4728	126.199	0.00830907
GM26862	CG6300	GD20102	50.4396	102.687	0.00303
GM26872	CG4733	GD19321	6.99615	13.9012	0.0160474
GM26890	CG4562	GD20097	36.9045	20.6114	0.0119711
Mal-A1	Mal-A1	Mal-A1	328.958	678.692	0.0167012
Mal-A4	Mal-A4	GD10565	54.2086	32.2036	0.0481809
MtnA	MtnA	MtnA	7700.77	49009.1	0.00181038
MtnD	MtnD	MtnD	169.826	1473.46	0.00303
Obp19c	Obp19c	Obp19c	141.833	46.759	0.00181038
Obp99a	Obp99a	Obp99a	1245.99	568.526	0.00181038
Obp99b	Obp99b	Obp99b	1474.03	508.452	0.00181038
Sry-alpha	Sry-alpha	Sry-alpha	21.5737	1.20348	0.00181038
w	w	w	24.5395	11.9195	0.0358915
Est-6	Est-6	Est-6	54.5169	120.987	0.00181038

## Sheet: Supplemental Table 4
Supplemental Table 4: Genes differentially expressed by D. sechellia but not D. simulans or D. melanogaster.
sec	mel	sim	sec control fpkm	sec LD fpkm	sec qvalue
GM16453	Acf	GD21605	27.6011	59.2907	0.00303
GM26364	Ada2b	GD20886	48.1032	85.0856	0.0246972
GM21320	ADD1	GD10828	12.7624	25.8254	0.00303
GM13935	AkhR	GD22549	55.8218	20.9067	0.00181038
GM21407	Amph	GD10903	48.4607	87.5318	0.0213882
GM26609	ana1	GD21108	9.04528	23.0117	0.00181038
GM21363	ana3	GD10861	9.66259	27.2216	0.00181038
GM17444	ash1	GD12268	10.9907	19.6873	0.0353058
GM17026	AsnRS	GD21774	325.609	178.709	0.0312632
GM22343	AsnS	GD14936	100.942	36.91	0.00181038
GM26622	asp	GD21126	20.8608	44.3437	0.00529379
GM21552	Asx	GD11058	8.53686	19.323	0.00181038
GM23863	ATPsynepsilonL	GD18671	37.5654	0	0.00181038
GM12535	Atx-1	GD16817	2.35716	0	0.00181038
GM15643	babos	GD25132	139.739	76.6823	0.0338647
GM10162	ball	GD18116	44.5685	88.1826	0.00830907
GM16969	barr	GD21719	13.195	29.9812	0.00181038
GM26780	bip2	GD15475	53.4445	110.258	0.00303
GM26077	Blm	GD20640	16.5177	29.3298	0.0252131
GM26238	bocks	GD20779	30.4283	67.7362	0.00181038
GM13896	Bre1	GD17597	29.9522	61.3678	0.00730275
GM14432	Bro	GD13634	5.63728	0	0.00181038
GM16494	BubR1	GD10345	14.6757	26.0111	0.0292997
GM21191	Caf1-180	GD24564	27.7206	55.6899	0.00730275
GM20484	cag	GD15259	79.931	134.697	0.043388
GM11105	cana	GD23772	11.3938	20.8414	0.0160474
GM12803	Cap-D2	GD21449	11.5464	20.6475	0.0287053
GM13418	caz	GD17272	59.5136	34.5643	0.0481809
GM10911	Ccp84Ad	GD16755	0	6.79592	0.00181038
GM10534	Ccp84Ae	GD19530	0	3.70678	0.00181038
GM10910	Ccp84Ag	GD19890	0	12.9708	0.00181038
GM23132	Cdk2	GD19371	42.4442	72.2085	0.0489957
GM25508	Cep135	GD14526	5.02643	13.1905	0.0167012
GM17004	CG10188	GD21752	13.8023	29.316	0.00181038
GM26524	CG10300	GD21032	13.8789	4.38321	0.0269477
GM15847	CG10321	GD11609	26.8743	54.8147	0.00181038
GM15415	CG10324	GD20273	9.08216	18.1647	0.0256787
GM10437	CG10435	GD19439	33.0513	71.9228	0.00181038
GM15752	CG10527	GD25227	404.074	212.049	0.0167012
GM15793	CG10543	GD11554	14.0973	25.1665	0.030382
GM13909	CG10592	GD13186	163.077	60.8417	0.00181038
GM17059	CG10600	GD21806	17.8715	30.6352	0.0387883
GM17050	CG10621	GD21797	316.417	138.414	0.00181038
GM17043	CG10650	GD21791	141.715	82.7292	0.0369129
GM24583	CG10710	GD12652	1.92621	5.74522	0.0252131
GM20285	CG10814	GD25765	324.403	65.9316	0.00181038
GM21838	CG10910	GD11332	104.377	47.3128	0.00181038
GM21898	CG10927	GD11395	7.45624	17.3443	0.0269477
GM10842	CG10979	GD19823	29.2448	54.116	0.0167012
GM16478	CG11211	GD10332	66.5049	29.7279	0.0256787
GM11872	CG11413	GD11870	7.16824	28.3025	0.0167012
GM22449	CG11425	GD15032	151.231	73.5074	0.00730275
GM22448	CG11426	GD15031	66.3062	36.0667	0.0233042
GM16717	CG11454	GD23003	24.0518	57.1228	0.0101794
GM23685	CG11723	GD22872	19.9305	37.1509	0.0382434
GM16657	CG11835	GD22950	5.90353	12.2742	0.0213882
GM12764	CG11873	GD21411	11.1584	19.2088	0.0485901
GM12773	CG11898	GD21422	12.173	6.81147	0.0456502
GM16677	CG11911	GD22965	3358.83	1286.69	0.0101794
GM26290	CG11985	GD20826	292.226	580.916	0.0328545
GM13727	CG12057	GD16935	656.583	138.607	0.00181038
GM21301	CG12116	GD16109	710.758	372.834	0.0233042
GM10827	CG12170	GD19804	52.5239	29.2219	0.0358915
GM12679	CG12184	GD16287	4.80839	10.929	0.00181038
GM24502	CG12316	GD12573	14.3623	26.0273	0.0213882
GM20490	CG12343	GD25952	52.2291	108.28	0.00638248
GM23868	CG12420	GD18675	2.72645	0	0.00181038
GM14662	CG12607	GD13846	0	4.15606	0.00181038
GM11522	CG12716	GD15911	2.60178	19.7888	0.00181038
GM11534	CG12717	GD20914	10.1369	21.8824	0.00422274
GM21248	CG12942	GD15388	17.5902	33.6199	0.00924819
GM24371	CG13026	GD12446	25.0179	73.6293	0.00830907
GM22649	CG1304	GD15519	322.788	187.541	0.0382434
GM24420	CG13044	GD12490	0	4.25132	0.00181038
GM24424	CG13047	GD12495	0	5.81352	0.00181038
GM17369	CG13078	GD24226	88.259	13.0712	0.00181038
GM20466	CG13215	GD25935	8.01219	67.5258	0.00303
GM20469	CG13217	GD25938	0	10.3073	0.00181038
GM21436	CG13321	GD10934	374.332	202.606	0.0145484
GM19034	CG13366	GD16472	42.7064	78.6339	0.0226106
GM19081	CG13367	GD16519	32.707	63.9643	0.00529379
GM24489	CG13454	GD12560	6.76058	0	0.00303
GM23513	CG13607	GD18323	67.8225	23.6169	0.00181038
GM23476	CG13625	GD18284	21.6747	39.5104	0.0160474
GM24968	CG13676	GD13017	2.08764	5.74878	0.0233042
GM17654	CG1368	GD17154	7.04833	43.1353	0.00181038
GM13953	CG13712	GD13236	4.93936	0	0.0101794
GM14677	CG13713	GD13859	7.05836	0	0.00303
GM14375	CG13912	GD13591	91.8404	23.9377	0.00181038
GM17980	CG13992	GD22618	28.6335	12.3924	0.00303
GM18013	CG14014	GD22647	4.85347	0	0.00181038
GM14920	CG14073	GD12326	12.3554	23.6692	0.00830907
GM14995	CG14074	GD14773	9.20328	21.412	0.020885
GM25415	CG14111	GD14445	2.68886	0	0.00181038
GM25236	CG14147	GD14270	0	6.24165	0.00181038
GM22758	CG14195	GD15593	8.08486	3.25815	0.0328545
GM22756	CG14196	GD15591	34.1311	17.239	0.0167012
GM20568	CG1441	GD10039	4.90027	11.6655	0.0353058
GM17502	CG14427	GD16831	6.38534	0	0.00181038
GM21855	CG14500	GD11349	563.778	225.435	0.00181038
GM22114	CG14568	GD12091	0	2.59093	0.00422274
GM22402	CG14573	GD14990	0	2.77663	0.00181038
GM17670	CG1461	GD17166	45.1322	24.7477	0.0334277
GM19113	CG14629	GD16543	246.116	142.132	0.0328545
GM11392	CG1468	GD14578	61.9822	127.12	0.00529379
GM23957	CG14710	GD18767	17.4141	38.5005	0.00529379
GM23961	CG14712	GD18770	16.9719	28.8244	0.0437403
GM21046	CG14752	GD10576	0	6.92484	0.00529379
GM18949	CG14814	GD24625	44.5016	79.2178	0.0369129
GM18945	CG14818	GD16409	642.094	335.991	0.0269477
GM15422	CG14903	GD20280	102.277	199.093	0.0274527
GM14074	CG14965	GD13349	9.38536	18.6373	0.0400719
GM14015	CG14995	GD13294	7.08196	15.2182	0.0382434
GM21918	CG15080	GD11412	0.928298	2.74081	0.0201678
GM17237	CG15141	GD24108	47.4669	82.3228	0.0400719
GM17044	CG15170	GD21792	7.62271	3.08336	0.0372553
GM11451	CG15203	GD16999	82.1268	168.83	0.0246972
GM13933	CG15213	GD13214	0	252.424	0.00181038
GM13106	CG15221	GD17047	55.6682	23.6022	0.00181038
GM14287	CG15254	GD21949	569.77	316.731	0.0334277
GM14306	CG15255	GD21951	386.636	174.683	0.00422274
GM16005	CG15263	GD24001	3.14339	57.1343	0.00181038
GM14665	CG15279	GD21984	76.2755	35.8687	0.00181038
GM23740	CG15382	GD23135	24.6673	0	0.00181038
GM12171	CG15531	GD17223	230.805	115.257	0.00303
GM13954	CG15876	GD13237	6.70634	0	0.00181038
GM20580	CG1648	GD10052	1410.9	308.98	0.00181038
GM26269	CG16749	GD20806	881.795	400.731	0.00181038
GM24294	CG16775	GD12364	84.0181	26.362	0.00181038
GM18304	CG16786	GD15461	1.63831	4.89236	0.0226106
GM10290	CG16815	GD23875	2.8382	0	0.00303
GM21871	CG16836	GD11367	971.902	438.445	0.00422274
GM15027	CG16884	GD22028	22.0091	85.3359	0.00181038
GM25801	CG16972	GD22080	11.0758	20.8587	0.00830907
GM23597	CG17119	GD18410	46.1673	21.3808	0.00830907
GM13285	CG17159	GD15471	55.5614	106.608	0.00422274
GM11473	CG1737	GD17016	29.3995	50.5952	0.0380571
GM18099	CG17612	GD22716	12.4245	28.9517	0.00638248
GM17695	CG17633	GD23629	914.378	402.285	0.00529379
GM15335	CG17802	GD20209	11.0209	23.4119	0.015393
GM15149	CG17930	GD19091	10.8251	4.03825	0.0323596
GM13732	CG18304	GD22530	5.98555	12.6516	0.00303
GM21332	CG18343	GD10840	128.578	52.0979	0.0475062
GM19653	CG1840	GD17055	117.553	50.2716	0.0400719
GM13467	CG18585	GD22482	228.256	103.035	0.00181038
GM12810	CG18731	GD21456	103.376	217.884	0.0196261
GM12753	CG1951	GD21400	19.2013	34.9836	0.0160474
GM16458	CG2003	GD21609	27.5164	14.4244	0.0405985
GM11229	CG2129	GD16882	17.0434	34.4692	0.00730275
GM21166	CG30007	GD10697	10.0214	18.869	0.00924819
GM21365	CG30047	GD10862	30.5472	16.3164	0.0174455
GM19988	CG30101	GD25483	1.96676	8.63349	0.0380571
GM19965	CG30105	GD25458	16.1756	40.8866	0.0323596
GM18500	CG3036	GD23308	86.9011	43.1333	0.00529379
GM16074	CG3065	GD11817	27.2006	47.3925	0.0479231
GM11352	CG3106	GD24559	91.3949	17.0404	0.00181038
GM17616	CG31086	GD21274	99.0069	34.9732	0.00181038
GM17750	CG31108	GD18234	34.1193	60.6197	0.0312632
GM17760	CG31109	GD18242	45.1787	94.1717	0.0119711
GM23130	CG31205	GD19368	105.809	35.1778	0.00181038
GM15210	CG31265	GD19141	81.1591	41.647	0.0213882
GM25763	CG31296	GD20339	4.13553	13.5851	0.0448764
GM23591	CG31365	GD18405	17.3825	31.3519	0.0201678
GM23738	CG31454	GD18547	8.6579	2.40567	0.0201678
GM17749	CG31510	GD18233	10.8292	19.2732	0.0309516
GM16121	CG31601	GD21622	16.4759	37.9938	0.015393
GM16696	CG31974	GD22985	23.1822	46.5405	0.0137829
GM14585	CG32266	GD13778	0	23.082	0.00181038
GM11131	CG3238	GD22755	29.4819	57.7019	0.00529379
GM22392	CG32444	GD14982	263.454	626.913	0.00181038
GM13375	CG32523	GD17523	151.319	73.0374	0.0111139
GM11344	CG32695	GD24555	441.824	159.932	0.0101794
GM19044	CG32816	GD16483	1.57386	6.85716	0.0274527
GM24333	CG33052	GD12406	30.2387	54.5406	0.0400719
GM16315	CG33213	GD18052	14.19	31.1986	0.0226106
GM15048	CG33306	GD22033	310.127	126.759	0.00181038
GM15052	CG33307	GD22034	153.471	62.8387	0.00181038
GM14261	CG3344	GD13518	99.3335	51.8903	0.00924819
GM23283	CG33511	GD21660	2.3193	7.45953	0.0405985
GM15728	CG33655	GD25206	6.77971	0	0.00730275
GM18984	CG33695	GD23773	29.8361	59.3102	0.0213882
GM22630	CG33713	GD15501	211.794	124.061	0.0387883
GM25703	CG34250	GD14710	201.965	656.316	0.0256787
GM16255	CG3430	GD23441	29.6398	60.8077	0.00529379
GM11877	CG3511	GD11875	17.9571	35.4524	0.00638248
GM15194	CG3534	GD19126	32.0606	70.3005	0.00181038
GM13420	CG3679	GD17274	36.8646	71.2914	0.00924819
GM20328	CG3814	GD25805	99.1968	51.2444	0.0196261
GM14909	CG3819	GD12316	190.126	62.4271	0.00181038
GM24550	CG3868	GD12622	201.669	80.5709	0.00181038
GM19265	CG3939	GD16632	521.264	268.717	0.0344687
GM24773	CG40191	GD15142	117.144	205.968	0.0364277
GM24879	CG4080	GD12929	23.4598	39.2629	0.0481809
GM15428	CG42232	GD20285	5.68731	16.6983	0.00181038
GM12482	CG42240	GD24755	87.0738	158.524	0.0160474
GM16572	CG42296	GD22878	3.92095	20.4923	0.00181038
GM17810	CG42367	GD23641	0	4.44617	0.0377279
GM20720	CG42516	GD10187	56.5973	145.444	0.00638248
GM11379	CG42797	GD16956	12.646	21.7493	0.0425233
GM15635	CG4294	GD25122	10.0934	18.0528	0.0280634
GM24806	CG43127	GD12859	56.9336	22.6742	0.00181038
GM22581	CG43672	GD17241	17.2455	5.98072	0.00181038
GM23796	CG43675	GD18606	72.5154	126.265	0.0312632
GM20320	CG44250	GD25797	383.576	162.661	0.00181038
GM12659	CG44774	GD16269	48.2296	82.1784	0.0420603
GM26890	CG4562	GD20097	36.9045	20.6114	0.0119711
GM11829	CG4563	GD24951	22.5925	6.39396	0.00181038
GM13457	CG4653	GD17298	971.039	439.157	0.00181038
GM17832	CG4709	GD23643	13.1106	27.422	0.0145484
GM26872	CG4733	GD19321	6.99615	13.9012	0.0160474
GM20287	CG4734	GD25769	120.105	59.1212	0.00181038
GM23622	CG4813	GD18432	21.1768	40.9125	0.0189064
GM17690	CG4854	GD19333	8.42701	26.1437	0.00303
GM16305	CG4884	GD18043	48.5391	88.8941	0.0382434
GM21842	CG5098	GD11336	13.0582	24.3556	0.0119711
GM14710	CG5150	GD13892	150.643	62.2089	0.00181038
GM22212	CG5199	GD12184	31.6983	56.7029	0.0364277
GM26198	CG5359	GD20745	16.9866	38.9561	0.0392831
GM11735	CG5367	GD22268	26.7028	10.6005	0.0182609
GM16045	CG5532	GD11795	420.476	181.826	0.00181038
GM24297	CG5535	GD12366	123.139	56.9876	0.00181038
GM21726	CG5550	GD11221	146.158	43.8503	0.00181038
GM24900	CG5644	GD12950	19.0534	8.03674	0.0213882
GM19935	CG5767	GD25423	133.071	71.9113	0.0372553
GM19936	CG5773	GD25425	139.584	64.1556	0.0309516
GM26400	CG5791	GD15173	544.017	99.4864	0.00181038
GM24453	CG5830	GD12523	27.1425	49.3851	0.0377279
GM12092	CG5853	GD22321	79.6107	46.1252	0.0334277
GM22292	CG5872	GD14886	14.158	28.4987	0.0137829
GM12147	CG5885	GD22325	371.728	204.949	0.0189064
GM12462	CG5921	GD16780	14.0438	7.35401	0.0328545
GM10322	CG5945	GD23879	198.057	82.9142	0.00181038
GM23307	CG6013	GD19268	33.774	75.9588	0.00422274
GM12456	CG6048	GD16772	194.056	79.6562	0.00181038
GM25771	CG6125	GD15099	35.5854	20.8981	0.0481809
GM25727	CG6126	GD20304	43.4066	23.3149	0.0274527
GM10142	CG6271	GD18100	4.23477	15.0813	0.015393
GM10148	CG6295	GD18105	89.1155	52.2154	0.0429336
GM17761	CG6422	GD18245	42.2158	72.4916	0.0344687
GM10170	CG6425	GD18122	11.6777	23.6823	0.0400719
GM24343	CG6479	GD12417	27.342	58.6866	0.00181038
GM25799	CG6654	GD20376	9.64856	21.2484	0.00303
GM25803	CG6752	GD20379	3.17152	6.15855	0.0489957
GM26091	CG6791	GD20654	16.3875	27.888	0.0410741
GM14310	CG6845	GD13546	8.08501	2.9453	0.0189064
GM14989	CG6885	GD14766	4.47448	0	0.00181038
GM13458	CG7025	GD22481	45.3626	24.5066	0.0323596
GM26411	CG7084	GD20931	52.4049	20.1478	0.00181038
GM10499	CG7110	GD23898	19.0397	38.8576	0.00303
GM18573	CG7239	GD23363	15.7955	34.7334	0.00422274
GM11521	CG7300	GD22236	7.32476	3.3615	0.0410741
GM14770	CG7386	GD13947	6.83878	13.6541	0.0387883
GM24969	CG7504	GD13018	11.4674	19.9333	0.0429336
GM22373	CG7519	GD14964	109.99	57.8846	0.0280634
GM16106	CG7631	GD24016	115.019	59.4485	0.015393
GM13392	CG7692	GD14702	2.39047	5.5969	0.0174455
GM25682	CG7730	GD14687	20.0132	35.3265	0.0456502
GM21962	CG7744	GD11456	41.3377	74.4091	0.0221423
GM12221	CG7837	GD17666	8.31539	15.9864	0.0167012
GM16495	CG7881	GD10346	70.7461	29.0638	0.00181038
GM16529	CG7882	GD10389	63.6993	35.7336	0.0226106
GM23701	CG7910	GD18511	148.652	85.8314	0.0420603
GM15309	CG7916	GD23932	1399.19	611.945	0.00181038
GM15330	CG7968	GD23934	109.569	62.0017	0.0470343
GM22755	CG7992	GD15589	43.0533	16.1024	0.0201678
GM20157	CG8089	GD25635	9.57942	21.5502	0.00730275
GM23754	CG8116	GD18565	138.417	264.859	0.0182609
GM23798	CG8129	GD18609	18.7841	7.24067	0.00830907
GM20107	CG8299	GD25584	106.593	19.5714	0.00181038
GM23819	CG8301	GD18629	19.0198	36.3449	0.0145484
GM20049	CG8311	GD25530	89.5661	38.4093	0.00303
GM21649	CG8320	GD11148	109.961	61.9594	0.0456502
GM16537	CG8343	GD10399	507.996	264.908	0.0145484
GM25958	CG8483	GD20518	2.95752	8.99416	0.0323596
GM13761	CG8560	GD13057	342.161	107.811	0.00181038
GM14841	CG8562	GD14014	279.27	127.594	0.00181038
GM24097	CG8773	GD18895	50.2507	27.3134	0.0174455
GM20346	CG8785	GD25825	97.0798	31.9894	0.00181038
GM17033	CG8786	GD12263	11.1159	22.4944	0.0495029
GM24572	CG8833	GD12644	12.0043	22.6804	0.0145484
GM14468	CG8960	GD13665	11.0406	0	0.00181038
GM20456	CG9062	GD25924	33.4624	57.3996	0.0410741
GM18041	CG9121	GD14930	4.13003	1.09759	0.0405985
GM16861	CG9143	GD25289	10.8819	26.9557	0.0274527
GM23287	CG9265	GD21662	8.88287	19.3614	0.0348909
GM25576	CG9293	GD22064	19.3133	54.8512	0.00181038
GM26243	CG9396	GD20783	271.865	129.142	0.00529379
GM18316	CG9451	GD12277	32.4973	12.4087	0.00181038
GM26204	CG9458	GD20751	66.3406	31.7315	0.0298453
GM17950	CG9497	GD22588	64.1823	35.7037	0.0196261
GM17941	CG9527	GD22578	115.744	57.9177	0.00303
GM13367	CG9609	GD15724	22.2213	40.4449	0.0377279
GM26363	CG9636	GD20885	16.9749	32.899	0.0160474
GM13371	CG9672	GD15727	49.9246	19.1902	0.0145484
GM13373	CG9673	GD15728	738.983	401.671	0.0252131
GM16399	CG9864	GD25294	32.6757	14.718	0.00529379
GM25896	CG9926	GD20466	33.875	65.5322	0.0182609
GM25877	CG9928	GD22088	1200.18	2712.44	0.0111139
GM14087	Cht7	GD13359	1.93457	4.74337	0.0382434
GM15753	Cht9	GD25228	58.8781	13.1513	0.00181038
GM14651	Claspin	GD13837	15.6702	37.8165	0.00181038
GM25421	cmb	GD14451	16.4813	29.8301	0.0196261
GM20278	cnn	GD25761	25.2583	44.8745	0.0252131
Cp110	Cp110	Cp110	7.16768	14.7715	0.0252131
GM11488	Cp190	Cen190	33.0889	63.1409	0.030382
GM21594	Cp7Fa	GD16900	103.236	387.561	0.00181038
GM21605	Cp7Fb	GD16901	109.583	46.9668	0.00730275
GM21616	Cp7Fc	GD16903	229.913	90.6178	0.00422274
GM12910	Cpr100A	GD15195	78.1273	195.917	0.00181038
GM13864	Cpr65Av	GD13147	0	6.39181	0.00529379
GM13791	Cpr65Ea	GD17593	3.40587	134.404	0.0287053
GM25232	Cpr67Fa1	GD14266	0	14.8196	0.00181038
GM19583	Cpr76Bd	GD14810	4.47757	9.72844	0.0226106
GM22355	Cpr78Cc	GD14949	3.71849	49.0037	0.0226106
GM10136	Cpr97Eb	GD18097	25.1902	65.1756	0.00181038
GM23449	CycB3	GD18256	65.9378	130.646	0.00924819
GM18539	Cyp28d1	GD23328	21.8965	92.9355	0.00181038
GM24146	Cyp6d5	GD18941	87.0197	215.662	0.00181038
GM18367	daw	GD23183	30.7383	12.4826	0.00303
GM18631	Daxx	GD23411	16.7993	33.1967	0.00924819
GM23619	Dcr-1	Dcr-1	7.34802	13.1964	0.0292997
GM16838	Der-1	GD23120	181.429	59.6587	0.020885
GM12214	dgt1	GD17628	22.2599	38.5646	0.0456502
GM12326	dgt4	EG:EG0007.10	30.5729	61.983	0.0400719
GM14289	DIP2	GD25718	15.4903	29.1905	0.0145484
GM12907	dj-1beta	GD21547	148.656	81.1582	0.0353058
GM17128	dl	dl	32.1977	57.8682	0.020885
GM10690	Dlip2	GD19665	36.4373	82.4913	0.00730275
GM26698	dmGlut	GD23809	136.845	68.8703	0.0201678
GM10998	DNApol-alpha180	GD19968	13.1686	26.604	0.00303
GM22227	DNApol-alpha60	GD12199	23.9761	53.7562	0.00181038
GM10379	DNApol-alpha73	GD15188	25.7841	48.4276	0.00830907
GM22104	DNApol-eta	GD12080	14.7272	28.9912	0.00529379
GM13644	dnk	GD19261	125.963	223.167	0.0226106
GM21924	DptB	GD11418	865.141	233.42	0.00638248
GM20780	Drat	GD10242	118.238	52.9564	0.00181038
GM12060	drd	GD24816	26.1375	13.7096	0.0213882
GM14569	Drs	Drs	4410.82	1809.72	0.0137829
GM14156	dsb	GD13426	16.4738	6.82967	0.00730275
GM24053	Dtg	GD18852	4.25383	1.14386	0.0470343
GM20140	dup	GD25618	38.2971	85.0295	0.00181038
GM14290	E(bx)	GD13529	51.9658	116.023	0.00181038
GM13693	e(r)	GD15793	262.061	592.753	0.00181038
GM10204	E(spl)m4-BFM	m4	3.87462	0	0.00303
GM26294	E(var)3-9	anon-EST:fe1E9	36.6427	74.1189	0.00303
GM13773	eco	GD13071	30.68	58.5407	0.0101794
GM25706	edin	GD14712	317.049	85.0071	0.00181038
GM15515	egl	GD25020	31.91	54.1341	0.0429336
GM15522	Eglp4	GD25026	230.745	121.204	0.0252131
GM23535	eIF4G2	GD18348	15.9241	28.5716	0.0213882
GM18486	Elba3	GD23295	10.0595	0	0.00181038
GM25591	elg1	GD14600	23.209	43.9896	0.00830907
GM23182	EloB	GD20055	188.797	332.79	0.0470343
GM23846	eloF	GD18654	439.483	205.091	0.00730275
GM26804	Eph	GD24409	63.4728	126.199	0.00830907
GM20442	etaTry	GD25909	58.3334	31.3182	0.0196261
GM10156	Ets97D	GD18111	18.2079	37.0461	0.00730275
DesatF	Fad2	DesatF	647.523	214.223	0.00181038
GM10427	Fancm	GD19428	11.6056	19.9985	0.0382434
GM12876	Fer2LCH	GD21514	904.833	2029.22	0.00303
GM25681	Fit2	GD14686	12.4256	23.5726	0.0246972
GM21945	FK506-bp2	GD11442	1638.17	923.841	0.030382
GM18667	fzy	GD24052	45.041	80.2421	0.0256787
GM22037	galla-1	GD11534	90.1295	166.117	0.015393
GM20396	GalT1	GD25871	23.3445	41.2777	0.0392831
GM10569	Gasp	GD19561	25.8637	51.2798	0.0372553
GM18170	GATAd	GD23678	21.251	44.7041	0.00181038
GM25533	gdl	GD14548	22.8963	55.2116	0.00529379
GM22256	gig	GD14854	11.2179	19.7122	0.0274527
GM26512	GILT2	GD21021	175.959	90.2163	0.0119711
GM17160	glu	GD21899	18.764	45.772	0.00181038
GM17290	Grip71	GD24153	36.4473	68.3763	0.00730275
GM20005	GstS1	GD25495	364.978	740.787	0.0145484
GM16605	halo	GD22905	26.1015	0	0.00181038
GM16408	heph	GD16206	31.1858	53.704	0.0358915
GM21777	Hexo2	GD16914	23.9673	12.6401	0.0323596
GM16974	Hf	Hf	125.381	60.2898	0.00303
GM14992	HipHop	GD14769	76.8134	152.134	0.0119711
GM15459	hll	GD23949	8.05661	27.6913	0.00181038
GM11302	Hmr	Hmr	3.4711	12.4606	0.00924819
GM23767	hng2	GD18578	12.6093	32.7811	0.00730275
GM17636	hoip	GD23622	1219.94	568.876	0.00181038
GM13081	HP5	GD17023	23.6324	41.454	0.0328545
GM24839	Ilp4	GD12891	7.15941	0	0.00181038
GM21866	IM2	GD11363	2620.72	690.724	0.00303
GM15770	IM4	GD25246	4890.47	2404.5	0.0338647
GM13995	ImpL2	ImpL2	122.474	57.1819	0.00303
GM21283	iotaTry	GD15392	133.661	60.8045	0.00303
GM16626	Iris	GD22926	58.242	27.7463	0.00422274
GM17065	Irk3	GD21812	27.6813	11.5599	0.00638248
GM23503	jnj	GD18313	15.8484	37.1674	0.00181038
GM14741	Jon65Aiii	GD13923	3757.99	1646.53	0.0213882
GM23879	jumu	GD18690	22.4146	39.4568	0.030382
GM25990	kar	GD20550	77.4899	34.1267	0.00181038
GM14227	Klp61F	GD13489	14.6566	32.4494	0.00181038
GM24884	Klp67A	GD12936	19.7085	34.9628	0.0420603
GM25299	Klp68D	GD14330	17.4785	31.3285	0.0226106
GM16772	kraken	GD23051	203.712	93.0879	0.00181038
GM20076	krimp	GD15225	21.7678	43.0133	0.00422274
GM16040	l(2)dtl	GD11788	21.8186	38.4331	0.0380571
GM19678	Lcp65Ac	GD13939	0	3.59069	0.0382434
GM17343	lectin-37Db	GD24202	159.122	77.058	0.0372553
GM26530	Lsd-1	GD21037	222.121	70.7115	0.00181038
GM14382	LysE	GD13594	1050.84	37.3751	0.00181038
GM21138	Map60	GD10668	55.4539	122.829	0.00181038
GM18506	Marcal1	GD23310	10.7436	25.2404	0.00303
GM20498	Mat1	GD25961	39.2628	76.3997	0.0160474
GM26775	mav	GD15474	47.0803	90.2177	0.00924819
GM25580	Mbs	GD14592	21.8755	38.0901	0.0398665
GM23713	Mcm2	GD18528	43.2109	75.7094	0.0353058
GM20401	MCPH1	GD25875	26.9264	49.1635	0.0489957
GM21916	Mctp	GD11410	15.5791	29.3604	0.0256787
GM12460	MCTS1	GD16778	149.08	83.179	0.0429336
GM10767	MED31	GD19742	79.474	147.784	0.0182609
GM15884	mei-S332	GD11646	6.8234	17.8285	0.00924819
GM16021	mi	GD11771	22.2072	39.9559	0.0221423
GM26195	Mical	GD20744	18.0339	33.2489	0.020885
GM24530	mop	GD12600	29.6117	52.6892	0.0274527
GM25788	MRG15	GD20365	31.6939	57.3146	0.0240232
GM14107	Mrtf	GD13375	10.8778	21.0398	0.00303
GM10647	mtd	GD19631	44.0928	76.0062	0.0456502
GM23882	mthl11	GD18692	2.41766	0	0.00181038
GM21609	Mtk	Mtk	7101.56	2417.74	0.0119711
MtnA	MtnA	MtnA	7700.77	49009.1	0.00181038
MtnD	MtnD	MtnD	169.826	1473.46	0.00303
GM17674	Muc12Ea	GD17169	37.8408	162.272	0.00181038
GM18963	Mur2B	GD16418	11.6948	24.909	0.0119711
GM16947	mus201	GD23543	8.17187	19.3066	0.00181038
GM20349	muskelin	GD25828	69.2606	121.661	0.0353058
GM18028	Ncoa6	GD22656	12.8955	22.2082	0.0420603
GM19202	ND-B14.5A	GD16591	883.019	509.313	0.0485901
GM17605	Ndc80	GD24521	13.1818	29.6613	0.0252131
GM13834	ndl	GD13121	22.6783	6.98147	0.00181038
GM15078	Nelf-A	GD19408	17.3165	36.1587	0.00303
GM20344	nemy	GD25823	55.5369	27.6398	0.0382434
GM22138	Neu2	GD12116	2.40367	0	0.00181038
GM24527	NHP2	GD12597	276.236	143.026	0.0160474
GM15419	NimB1	GD23942	6.6143	1.45618	0.0309516
GM26287	Nmdmc	GD20823	116.408	54.7978	0.00422274
GM17631	Nna1	GD17141	11.8385	23.2321	0.00924819
GM13710	Nost	GD16922	38.1086	78.1845	0.00422274
GM21688	Nox	GD11185	4.31863	9.34441	0.0233042
GM23054	Npc1b	GD17503	76.6719	29.8724	0.00181038
GM26189	Npc2d	GD20738	600.868	207.431	0.00181038
GM16309	NSD	GD18047	25.7172	55.1247	0.00181038
GM18798	Nup154	GD23750	30.3472	52.2032	0.0454163
GM15649	Oatp58Db	GD15209	39.8931	19.1872	0.0312632
Obp19c	Obp19c	Obp19c	141.833	46.759	0.00181038
GM20781	Orc1	GD10243	21.7724	42.6078	0.00730275
GM26581	Orct	GD21083	34.8511	16.5871	0.0129129
GM19914	Ote	GD25400	55.8632	105.999	0.0129129
GM24070	Paip2	GD18867	130.447	268.694	0.00529379
GM24863	path	GD12915	495.508	221.493	0.00181038
GM10994	Pbp95	GD19964	7.03563	13.9552	0.0372553
GM26437	Pebp1	GD20954	2896.05	1317.42	0.0189064
GM12960	Peritrophin-15a	GD22405	6265.22	3043.23	0.0201678
GM17951	Pez	GD22589	15.8531	27.089	0.0425233
GM26096	PGRP-LB	GD15111	67.1801	35.5696	0.0380571
GM24370	PGRP-SB1	PGRP-SB1	326.565	146.831	0.0213882
GM21061	PGRP-SC2	PGRP-SC2	754.128	378.882	0.00730275
GM18917	ph-p	GD24614	8.05944	15.8219	0.0174455
GM12882	PH4alphaEFB	GD21521	27.3801	9.39395	0.00181038
GM26738	Phae1	GD23819	67.1187	23.8388	0.00181038
GM24870	phol	GD12921	26.1044	46.0217	0.0348909
GM16627	Pino	GD22927	142.575	84.5694	0.043388
GM15701	pirk	GD25179	59.7983	29.6626	0.0382434
GM24507	Plp	GD12579	8.72085	18.9624	0.00303
GM20141	Pms2	GD25619	19.8273	35.9699	0.0174455
GM15616	Ppa	GD25110	11.5354	4.5045	0.0167012
GM16292	Ppn	GD18032	8.79115	5.05695	0.0364277
GM17795	PQBP1	GD21167	24.796	61.9959	0.00181038
GM24564	Ptip	GD12637	12.1763	26.1393	0.00181038
GM15107	r-l	GD20011	112.472	64.8202	0.0338647
GM15911	rad50	GD11670	17.5908	33.2441	0.0160474
GM23580	Rad60	GD18396	30.2577	53.9737	0.0323596
GM25634	RAF2	GD14638	20.4586	39.1257	0.0129129
GM24539	RecQ5	GD12613	19.7215	41.2849	0.00181038
GM23477	REPTOR	GD18285	23.2163	44.0021	0.00730275
GM26790	RhoGAP102A	GD15476	1.68332	4.93429	0.0252131
GM13777	RhoGEF4	GD13075	17.605	31.6109	0.0400719
GM14680	RhoGEF64C	GD13862	13.8914	24.6366	0.0274527
GM15286	RpII33	GD23930	38.8684	70.4323	0.0348909
GM25301	RpL10Ab	GD14333	4235.63	1996.43	0.0380571
GM25815	RpS5b	GD20391	2011.05	1037.34	0.0481809
GM26097	sals	GD20658	16.2511	29.5392	0.0189064
GM10938	Sas-4	GD19917	12.4752	28.1078	0.00181038
GM20884	sced	GD10414	23.4284	44.926	0.0101794
GM26235	Scm	GD20776	27.1157	45.5546	0.0448764
GM20966	scra	GD10494	18.1199	31.7241	0.0312632
GM21558	Sec61beta	GD11064	1194.22	575.388	0.00422274
GM19233	Seipin	GD24734	115.521	49.9989	0.00181038
GM21468	Ser8	GD15412	186.139	85.038	0.00181038
GM16620	serp	GD12255	8.26827	17.2326	0.0262802
GM24085	sim	GD18883	4.9852	14.3827	0.00181038
GM14656	slow	GD13841	9.74823	18.8504	0.043388
GM11667	SmB	GD22258	277.887	118.929	0.00181038
GM26555	SMC1	GD21062	19.8034	34.6815	0.0287053
GM20175	SMC2	GD25652	17.5761	35.0788	0.00422274
GM13388	SMC3	GD15741	21.0424	37.2464	0.0256787
GM22385	SMC5	GD14975	16.4027	36.1433	0.00303
GM25414	SNCF	GD14444	31.9423	0	0.00181038
GM15878	Snp	GD11641	74.5139	125.428	0.0485901
GM22321	Spc105R	GD14909	6.34388	20.2424	0.00181038
GM23823	SpdS	GD18634	200.371	103.787	0.0111139
GM16722	spen	GD23007	27.6353	50.5311	0.0201678
GM18139	Spindly	GD22747	10.5392	23.5937	0.00181038
GM21844	Spn55B	GD11338	57.7614	30.5876	0.0189064
GM13910	spo	GD13187	11.0321	3.68314	0.0189064
GM16661	Spp	GD22952	116.585	64.2312	0.0167012
Sry-alpha	Sry-alpha	Sry-alpha	21.5737	1.20348	0.00181038
GM16854	Ssb-c31a	GD23514	338.697	595.53	0.0456502
GM17052	ssp3	GD21799	11.0497	21.0824	0.015393
GM25590	SsRbeta	GD14599	393.906	216.115	0.0167012
GM14213	stet	GD13475	107.98	42.9067	0.00181038
GM24647	sti	GD12711	13.1713	22.7187	0.0410741
GM24548	stwl	GD17574	18.5092	45.1839	0.00181038
GM21096	Su(var)2-10	GD10632	59.9373	103.197	0.0499549
GM20199	Su(var)2-HP2	GD25670	9.1673	15.472	0.0481809
GM22263	Su(var)3-3	GD14861	15.8141	27.3131	0.0437403
GM24093	Su(var)3-7	GD18892	34.4828	65.9794	0.0111139
GM15475	Su(z)12	GD12239	25.4646	42.4454	0.0479231
GM19953	sub	GD25444	30.6733	58.6626	0.0119711
GM19959	swi2	GD25450	13.1978	5.97257	0.0382434
GM10686	tacc	GD19661	60.9284	125.535	0.00303
GM22735	Tao	GD15575	92.2632	227.137	0.00181038
GM20435	Tapdelta	GD25906	486.75	271.584	0.0292997
GM19827	TBCB	GD15215	47.3151	85.0085	0.0499549
GM19944	thr	GD25435	14.3537	33.4129	0.00181038
GM12702	Tip60	EG:EG0007.7	17.4027	33.1839	0.0226106
GM17351	tj	GD12036	33.0623	13.8737	0.00529379
GM18879	tko	GD16364	207.89	111.827	0.0338647
GM20762	tor	GD10226	18.3633	38.005	0.00181038
GM18467	Tps1	GD23282	373.836	192.498	0.0201678
GM19101	TRAM	GD16534	106.951	59.0012	0.0221423
GM16088	Tret1-1	GD10807	130.931	68.2168	0.0400719
GM13232	tsg	GD15950	2.17697	0	0.00181038
GM16144	tsh	GD24333	1.76406	4.57922	0.0298453
GM19127	Tsp2A	GD24713	130.254	65.1366	0.00638248
GM10739	TwdlV	GD19711	0	6.09893	0.00181038
GM17918	twe	GD21927	50.5663	109.068	0.00181038
GM10908	twr	GD19887	201.581	104.085	0.00303
GM22760	Ulp1	GD15595	88.0123	180.732	0.0129129
GM25445	upSET	GD14471	12.3736	21.1497	0.0400719
GM11876	uri	GD11874	24.574	45.7699	0.0167012
GM16748	ush	GD23030	8.02702	15.0429	0.0262802
GM16731	verm	GD12256	10.7863	25.5046	0.00303
GM14259	Vti1a	GD13516	43.6514	90.7899	0.0119711
w	w	w	24.5395	11.9195	0.0358915
GM21940	wbl	GD11437	73.0111	40.3122	0.0369129
GM14198	wek	GD21941	23.2574	50.0911	0.00422274
GM13334	xmas-2	GD15694	19.0234	39.6779	0.00303
GM17897	Xrp1	GD19257	128.976	244.404	0.0145484
GM11494	Yippee	GD15888	78.2152	153.74	0.0437403
GM25530	Z600	GD14545	93.5647	0	0.00181038
GM24841	Zasp67	GD12893	6.69671	16.5209	0.00730275
GM24376	zetaCOP	GD12449	223.21	122.478	0.020885
Est-6	Est-6	Est-6	54.5169	120.987	0.00181038

## Sheet: Supplemental Table 5
Supplemental Table 5: Genes differentially expressed by D. melanogaster, D. simulans and not D. sechellia. Those consistent with genetic asimilation (GA) are indicated.
mel	sec	sim	sec.control.fpkm	sec.LD.fpkm	sec.qvalue	sim.control.fpkm	sim.LD.fpkm	sim.qvalue	mel.control.fpkm	mel.LD.fpkm	mel.qvalue	sim.logFC	mel.logFC	sec.logFC	GA
CG8654	GM21988	GD11488	14.9536	9.30278	0.203813	21.4979	14.0116	0.00291088	15.4104	11.0855	0.034085	-0.617574	-0.47523	-0.684759	F									D	F
Amy-d	Amy-d	Amy-d	35.6911	23.2593	0.167428	280.871	827.454	0.00291088	176.007	253.912	0.00426353	1.55877	0.528696	-0.617757	F									U	F
Amy-p	Amy-p	Amy-d	55.5499	40.6067	0.321146	280.871	827.454	0.00291088	402.203	575.234	0.0170798	1.55877	0.516225	-0.452067	F									U	F
Cad74A	GM24339	GD12413	10.2096	12.0367	0.674514	4.28697	2.98709	0.0373166	4.4155	3.09513	0.0315028	-0.521218	-0.512577	0.237514	F									D	F
CG11892	GM17834	GD21203	130.794	215.614	0.102033	124.842	236.615	0.00291088	268.036	457.869	0.00426353	0.922438	0.772508	0.721154	F									U	F
CG15155	GM17268	GD24133	304.866	195.545	0.118238	40.5578	80.516	0.00291088	110.433	160.213	0.00426353	0.989296	0.53682	-0.640675	F									U	F
CG17751	GM26851	GD19299	116.98	100.977	0.682736	30.297	21.6189	0.0435717	16.9644	10.0627	0.00426353	-0.486882	-0.753493	-0.212235	F									D	F
CG8620	GM14824	GD13998	20.2007	21.224	0.952435	22.7606	57.3451	0.00291088	19.0277	62.4912	0.00426353	1.33313	1.71555	0.0712913	F									U	F
Fcp3C	GM18842	GD16341	142.875	86.0026	0.134584	126.915	77.1073	0.00291088	107.322	54.2075	0.00426353	-0.718923	-0.985381	-0.732301	F									D	F
Mur18B	GM22950	GD17434	608.517	853.905	0.366724	2537.45	7975.21	0.00291088	700.5	1599.6	0.00426353	1.65214	1.19125	0.488778	F									U	F
CG34172	GM18260	GD22869	4109.02	2758.01	0.173554	1238.88	1778.49	0.0240039	2230.96	3233.62	0.00426353	0.521616	0.535486	-0.575167	F									U	T/F
CG14245	GM10341	GD21301	252.285	188.641	0.419008	37.9836	127.155	0.00291088	322.177	790.861	0.00426353	1.74314	1.29557	-0.419411	F									U	F
AOX1	GM25762	GD20338	93.9883	162.232	0.060744	42.125	72.838	0.00291088	36.6472	51.671	0.00776781	0.790015	0.495652	0.787505	T									U	T
CG10513	GM17735	GD18217	544.795	856.977	0.180918	87.8168	278.624	0.00291088	95.6041	361.811	0.00426353	1.66575	1.92009	0.653543	T									U	T
CG13323	GM20316	GD25795	3109.33	2035.81	0.165563	1048.73	1663.25	0.00291088	249.926	393.345	0.00426353	0.665362	0.654294	-0.611001	T									U	T
CG14292	GM18675	GD20146	1000.37	1259.37	0.52777	861.17	1935.76	0.00291088	417.25	1142.83	0.00426353	1.16853	1.45363	0.332169	T									U	T
CG15406	GM18403	GD23217	67.009	100.799	0.187704	38.8338	74.1897	0.00291088	32.1852	71.0822	0.00426353	0.933906	1.14309	0.589055	T									U	T
CG15533	GM12878	GD21517	77.551	71.7836	0.865411	29.391	49.1497	0.00291088	1.70384	4.4492	0.00426353	0.741808	1.38476	-0.111491	T									U	T
CG31272	GM26154	GD20707	25.9401	37.2459	0.296503	6.90237	11.5284	0.00742275	9.22519	17.09	0.00426353	0.740029	0.889502	0.521898	T									U	T
CG3597	GM18234	GD22840	167.64	226.805	0.328571	94.8123	132.891	0.0470563	37.7815	52.7851	0.0229442	0.487097	0.482451	0.436086	T									U	T
CG4377	GM15682	GD25161	140.764	178.674	0.444165	48.6032	81.9022	0.00291088	38.3875	56.2227	0.0142654	0.752851	0.550516	0.344051	T									U	T
CG8093	GM20153	GD25632	265.634	222.596	0.623342	28.5629	42.7306	0.0199536	19.549	37.8708	0.00426353	0.581127	0.953991	-0.255012	T									U	T
CG8665	GM23412	GD24321	41.7864	54.9709	0.386176	6.82339	11.7135	0.00291088	3.7266	5.74541	0.00776781	0.779612	0.62455	0.395635	T									U	T
CG9360	GM15086	GD15972	205.573	231.888	0.769268	26.1885	122.125	0.00291088	32.327	50.8599	0.00426353	2.22135	0.653789	0.173777	T									U	T
Mal-A3	Mal-A3	GD10167	184.636	198.794	0.87189	24.7973	51.9049	0.00291088	12.3071	18.6687	0.00426353	1.06569	0.601131	0.10659	T									U	T

## Sheet: Supplemental Table 6
Supplemental Table 6: Genes differentially expressed by all three species in reponse to L-DOPA compated to control food.
mel	sec	sim	sec control fpkm	sec LD fpkm	sec qvalue	sim control fpkm	sim LD fpkm	sim qvalue	mel control fpkm	mel LD fpkm	mel qvalue
AttC	GM21465	AttC	646.053	186.403	0.00181038	12.3097	102.855	0.00291088	16.4733	4.0165	0.00426353
CG10514	GM17734	GD18216	53.791	102.84	0.0262802	103.68	161.82	0.00291088	178.564	312.517	0.00426353
CG14125	GM25314	GD14346	80.8342	345.476	0.00181038	44.2264	132.639	0.00291088	338.671	470.63	0.0111186
CG14187	GM22251	GD12223	86.4867	29.6762	0.0369129	138.716	65.2838	0.00291088	113.899	69.111	0.00426353
CG14309	GM18706	GD20173	93.1315	40.8365	0.00303	52.2744	30.3805	0.00291088	65.894	38.3165	0.00426353
CG31288	GM17729	GD18212	177.371	312.411	0.0382434	16.8059	27.6604	0.0053788	25.6118	42.6719	0.00426353
CG32023	GM24914	GD12960	41.4288	315.873	0.00181038	42.1022	96.104	0.00291088	38.8929	68.8663	0.00426353
CG32557	GM22848	GD15660	6.61603	13.9966	0.0213882	1.25525	2.5286	0.0225787	4.55532	9.7965	0.00426353
CG4363	GM15683	GD25162	417.904	834.481	0.00730275	80.9493	245.69	0.00291088	36.6558	59.9066	0.00426353
CG6484	GM19968	GD25462	78.1288	202.218	0.00181038	10.9232	18.6547	0.00291088	21.4446	32.8478	0.00426353
CG6910	GM25333	GD14365	50.4052	138.285	0.00181038	475.803	790.285	0.00291088	79.2071	115.845	0.00426353
CG9747	GM12172	GD17234	52.2741	20.758	0.00181038	30.6277	20.6014	0.0212631	35.6486	22.619	0.00426353
Cyp12d1-d	GM20476	GD25944	31.5113	94.9667	0.00181038	1.33416	13.3441	0.00291088	16.6353	22.6273	0.0445327
Ir7c	GM11977	GD16867	11.6752	3.27733	0.00181038	5.05037	3.09826	0.0185569	11.6005	7.23389	0.00426353
LManVI	GM12683	GD22379	31.2245	8.31611	0.00181038	6.32492	21.3392	0.00291088	43.8701	63.9418	0.00426353
Mal-A1	Mal-A1	Mal-A1	328.958	678.692	0.0167012	116.965	329.44	0.00291088	98.4271	195.659	0.00426353
Mal-A4	Mal-A4	GD10565	54.2086	32.2036	0.0481809	42.0373	73.2331	0.00291088	18.1233	27.9189	0.00426353
psd	GM17981	GD22619	225.752	90.6404	0.00181038	109.969	69.2051	0.00291088	59.3228	42.4198	0.00776781
St4	GM20241	GD25727	80.8099	29.3291	0.00181038	18.2557	11.5815	0.0185569	20.966	13.0921	0.00426353
tobi	GM17717	GD18201	530.466	1030.76	0.0256787	29.0865	125.974	0.00291088	27.3769	54.8195	0.00426353
Vm26Ab	GM18584	GD23372	3821.66	888.546	0.00181038	1264.68	726.802	0.00291088	1899.76	1384.11	0.0426812
Vm26Ac	GM17984	GD22621	410.549	83.8142	0.00181038	207.582	104.494	0.00291088	97.7367	69.8707	0.0170798
Vml	GM19220	GD16605	512.609	143.217	0.00181038	185.826	104.985	0.00291088	171.159	102.401	0.00426353

## Sheet: Supplemental Table 7
Supplemental Table 7: Gene Ontology term enrichment for genes differentially expressed by D. melanogaster in reponse to L-DOPA compated to control food.
Downregulated genes
Analysis Type:	PANTHER Overrepresentation Test (Released 20171205)
Annotation Version and Release Date:	GO Ontology database Released 2018-05-21
Analyzed List:	upload_1 (Drosophila melanogaster)
Reference List:	Drosophila melanogaster (all genes in database)
Test Type:	FISHER
GO cellular component complete	Drosophila melanogaster - REFLIST (13757)	upload_1 (12)	upload_1 (expected)	upload_1 (over/under)	upload_1 (fold Enrichment)	upload_1 (raw P-value)	upload_1 (FDR)
chorion (GO:0042600)	40	3	0.03	+	85.98	6.12e-06	0.00826
external encapsulating structure (GO:0030312)	45	3	0.04	+	76.43	8.56e-06	0.00577
Upregualted genes
No Significant terms

## Sheet: Supplemental Table 8
Supplemental Table 8: Gene Ontology term enrichment for genes differentially expressed by D. simulans in reponse to L-DOPA compated to control food.
Downregulated genes
Analysis Type:	PANTHER Overrepresentation Test (Released 20171205)
Annotation Version and Release Date:	GO Ontology database Released 2018-05-21
Analyzed List:	upload_1 (Drosophila melanogaster)
Reference List:	Drosophila melanogaster (all genes in database)
Test Type:	FISHER
GO cellular component complete	Drosophila melanogaster - REFLIST (13757)	upload_1 (105)	upload_1 (expected)	upload_1 (over/under)	upload_1 (fold Enrichment)	upload_1 (raw P-value)	upload_1 (FDR)
cytoplasm (GO:0005737)	4072	50	31.08	+	1.61	0.000145	0.0325
intracellular membrane-bounded organelle (GO:0043231)	4195	51	32.02	+	1.59	0.000114	0.0307
intracellular part (GO:0044424)	6108	68	46.62	+	1.46	4.27e-05	0.0192
intracellular (GO:0005622)	6130	68	46.79	+	1.45	4.35e-05	0.0147
cell (GO:0005623)	7128	76	54.4	+	1.4	2.08e-05	0.0281
cell part (GO:0044464)	7128	76	54.4	+	1.4	2.08e-05	0.0141
GO molecular function complete	Drosophila melanogaster - REFLIST (13757)	upload_1 (105)	upload_1 (expected)	upload_1 (over/under)	upload_1 (fold Enrichment)	upload_1 (raw P-value)	upload_1 (FDR)
phosphoric ester hydrolase activity (GO:0042578)	210	10	1.6	+	6.24	6.4e-06	0.0177
Upregualted genes
No Significant terms

## Sheet: Spplemental Table 9
Supplemental Table 8: Gene Ontology term enrichment for genes differentially expressed by D. sechellia in reponse to L-DOPA compated to control food.
Downregulated genes
Analysis Type:	PANTHER Overrepresentation Test (Released 20171205)
Annotation Version and Release Date:	GO Ontology database Released 2018-05-21
Analyzed List:	upload_1 (Drosophila melanogaster)
Reference List:	Drosophila melanogaster (all genes in database)
Test Type:	FISHER
GO biological process complete	Drosophila melanogaster - REFLIST (13757)	upload_1 (193)	upload_1 (expected)	upload_1 (over/under)	upload_1 (fold Enrichment)	upload_1 (raw P-value)	upload_1 (FDR)
proteolysis (GO:0006508)	810	31	11.36	+	2.73	5.1e-07	0.00393
GO cellular component complete	Drosophila melanogaster - REFLIST (13757)	upload_1 (193)	upload_1 (expected)	upload_1 (over/under)	upload_1 (fold Enrichment)	upload_1 (raw P-value)	upload_1 (FDR)
nucleus (GO:0005634)	2564	11	35.97	-	0.31	3.09e-07	0.000417
GO molecular function complete	Drosophila melanogaster - REFLIST (13757)	upload_1 (193)	upload_1 (expected)	upload_1 (over/under)	upload_1 (fold Enrichment)	upload_1 (raw P-value)	upload_1 (FDR)
carboxypeptidase activity (GO:0004180)	29	5	0.41	+	12.29	9.67e-05	0.0383
serine hydrolase activity (GO:0017171)	265	18	3.72	+	4.84	7.76e-08	0.000108
serine-type peptidase activity (GO:0008236)	264	17	3.7	+	4.59	3.69e-07	0.000256
serine-type endopeptidase activity (GO:0004252)	241	15	3.38	+	4.44	2.74e-06	0.00152
peptidase activity (GO:0008233)	559	28	7.84	+	3.57	9.6e-09	2.66e-05
endopeptidase activity (GO:0004175)	393	19	5.51	+	3.45	4.47e-06	0.00207
peptidase activity, acting on L-amino acid peptides (GO:0070011)	549	26	7.7	+	3.38	9.95e-08	9.19e-05
Upregualted genes
Analysis Type:	PANTHER Overrepresentation Test (Released 20171205)
Annotation Version and Release Date:	GO Ontology database Released 2018-05-21
Analyzed List:	upload_1 (Drosophila melanogaster)
Reference List:	Drosophila melanogaster (all genes in database)
Test Type:	FISHER
GO biological process complete	Drosophila melanogaster - REFLIST (13757)	upload_1 (272)	upload_1 (expected)	upload_1 (over/under)	upload_1 (fold Enrichment)	upload_1 (raw P-value)	upload_1 (FDR)
ciliary basal body organization (GO:0032053)	5	3	0.1	+	30.35	0.000376	0.0211
mitotic centrosome separation (GO:0007100)	7	3	0.14	+	21.68	0.000782	0.0398
non-recombinational repair (GO:0000726)	11	4	0.22	+	18.39	0.000159	0.00981
chromosome separation (GO:0051304)	21	6	0.42	+	14.45	1.06e-05	0.000903
DNA geometric change (GO:0032392)	18	5	0.36	+	14.05	6.67e-05	0.0045
pole cell formation (GO:0007279)	20	5	0.4	+	12.64	0.000102	0.00666
DNA duplex unwinding (GO:0032508)	16	4	0.32	+	12.64	0.000524	0.028
syncytial blastoderm mitotic cell cycle (GO:0035186)	17	4	0.34	+	11.9	0.000638	0.0334
centriole replication (GO:0007099)	26	6	0.51	+	11.67	2.98e-05	0.00229
centrosome duplication (GO:0051298)	35	8	0.69	+	11.56	1.45e-06	0.000157
centriole assembly (GO:0098534)	27	6	0.53	+	11.24	3.59e-05	0.00265
centrosome separation (GO:0051299)	19	4	0.38	+	10.65	0.000915	0.0463
double-strand break repair via homologous recombination (GO:0000724)	48	10	0.95	+	10.54	1.46e-07	1.97e-05
recombinational repair (GO:0000725)	49	10	0.97	+	10.32	1.73e-07	2.26e-05
pole cell development (GO:0007277)	30	6	0.59	+	10.12	6e-05	0.00416
mitotic cell cycle, embryonic (GO:0045448)	30	6	0.59	+	10.12	6e-05	0.00413
regulation of cell division (GO:0051302)	30	6	0.59	+	10.12	6e-05	0.00409
regulation of cell cycle G2/M phase transition (GO:1902749)	34	6	0.67	+	8.93	0.000111	0.00717
sister chromatid segregation (GO:0000819)	102	18	2.02	+	8.93	1.58e-11	7.6e-09
regulation of G2/M transition of mitotic cell cycle (GO:0010389)	34	6	0.67	+	8.93	0.000111	0.00711
sister chromatid cohesion (GO:0007062)	29	5	0.57	+	8.72	0.000464	0.0251
centrosome cycle (GO:0007098)	70	12	1.38	+	8.67	5.49e-08	7.83e-06
mitotic sister chromatid segregation (GO:0000070)	85	14	1.68	+	8.33	6.62e-09	1.38e-06
double-strand break repair (GO:0006302)	79	13	1.56	+	8.32	2.34e-08	3.53e-06
nuclear migration (GO:0007097)	31	5	0.61	+	8.16	0.000609	0.0323
chromosome condensation (GO:0030261)	53	8	1.05	+	7.63	2.18e-05	0.00173
mitotic nuclear division (GO:0140014)	117	16	2.31	+	6.92	6.03e-09	1.29e-06
nuclear chromosome segregation (GO:0098813)	163	22	3.22	+	6.83	9.87e-12	5.84e-09
DNA recombination (GO:0006310)	84	11	1.66	+	6.62	2.2e-06	0.000235
microtubule organizing center organization (GO:0031023)	92	12	1.82	+	6.6	7.85e-07	8.88e-05
chromosome segregation (GO:0007059)	180	23	3.56	+	6.46	9.03e-12	5.79e-09
chromosome organization involved in meiotic cell cycle (GO:0070192)	55	7	1.09	+	6.44	0.000189	0.0113
male meiotic nuclear division (GO:0007140)	80	10	1.58	+	6.32	9.3e-06	0.000813
DNA conformation change (GO:0071103)	128	16	2.53	+	6.32	1.92e-08	3.07e-06
DNA-dependent DNA replication (GO:0006261)	82	10	1.62	+	6.17	1.13e-05	0.000947
DNA replication (GO:0006260)	95	11	1.88	+	5.86	6.48e-06	0.000623
nuclear division (GO:0000280)	272	30	5.38	+	5.58	1.74e-13	2.24e-10
female meiotic nuclear division (GO:0007143)	74	8	1.46	+	5.47	0.000186	0.0113
regulation of cell cycle phase transition (GO:1901987)	103	11	2.04	+	5.4	1.31e-05	0.00107
organelle fission (GO:0048285)	284	30	5.62	+	5.34	4.85e-13	5.33e-10
DNA packaging (GO:0006323)	105	11	2.08	+	5.3	1.54e-05	0.00125
regulation of cell cycle process (GO:0010564)	172	18	3.4	+	5.29	3.06e-08	4.53e-06
mitotic cell cycle process (GO:1903047)	288	30	5.69	+	5.27	6.75e-13	6.49e-10
regulation of mitotic nuclear division (GO:0007088)	77	8	1.52	+	5.25	0.000239	0.014
regulation of mitotic cell cycle phase transition (GO:1901990)	100	10	1.98	+	5.06	5.43e-05	0.00387
DNA repair (GO:0006281)	171	17	3.38	+	5.03	1.47e-07	1.95e-05
meiotic chromosome segregation (GO:0045132)	81	8	1.6	+	5	0.000328	0.0187
mitotic cell cycle (GO:0000278)	408	40	8.07	+	4.96	4.46e-16	8.59e-13
regulation of nuclear division (GO:0051783)	83	8	1.64	+	4.87	0.000381	0.0213
ventral cord development (GO:0007419)	83	8	1.64	+	4.87	0.000381	0.0211
meiotic nuclear division (GO:0140013)	177	17	3.5	+	4.86	2.32e-07	2.93e-05
chromosome organization (GO:0051276)	568	54	11.23	+	4.81	5.17e-21	1.99e-17
meiotic cell cycle process (GO:1903046)	221	21	4.37	+	4.81	1.01e-08	1.99e-06
DNA metabolic process (GO:0006259)	297	28	5.87	+	4.77	3.65e-11	1.41e-08
cell cycle process (GO:0022402)	538	50	10.64	+	4.7	4.49e-19	1.15e-15
meiotic cell cycle (GO:0051321)	228	21	4.51	+	4.66	1.67e-08	2.79e-06
cell cycle (GO:0007049)	643	58	12.71	+	4.56	1.51e-21	1.16e-17
peripheral nervous system development (GO:0007422)	90	8	1.78	+	4.5	0.000628	0.0331
cellular response to DNA damage stimulus (GO:0006974)	207	18	4.09	+	4.4	3.99e-07	4.65e-05
regulation of mitotic cell cycle (GO:0007346)	201	17	3.97	+	4.28	1.21e-06	0.000134
regulation of cell cycle (GO:0051726)	316	26	6.25	+	4.16	2.81e-09	6.36e-07
spindle organization (GO:0007051)	125	10	2.47	+	4.05	0.000298	0.0173
gene silencing (GO:0016458)	138	11	2.73	+	4.03	0.000154	0.00958
protein-DNA complex subunit organization (GO:0071824)	115	9	2.27	+	3.96	0.00069	0.0359
regulation of chromosome organization (GO:0033044)	170	13	3.36	+	3.87	5.86e-05	0.0041
regulation of chromatin organization (GO:1902275)	121	9	2.39	+	3.76	0.000968	0.0487
chitin-based cuticle development (GO:0040003)	195	14	3.86	+	3.63	5.82e-05	0.00411
histone modification (GO:0016570)	183	13	3.62	+	3.59	0.000118	0.0075
cell maturation (GO:0048469)	171	12	3.38	+	3.55	0.000239	0.0139
cell division (GO:0051301)	258	18	5.1	+	3.53	7.43e-06	0.000681
covalent chromatin modification (GO:0016569)	201	14	3.97	+	3.52	7.9e-05	0.00524
oocyte differentiation (GO:0009994)	159	11	3.14	+	3.5	0.000483	0.026
chromatin organization (GO:0006325)	366	25	7.24	+	3.45	1.73e-07	2.22e-05
microtubule cytoskeleton organization (GO:0000226)	340	23	6.72	+	3.42	6.46e-07	7.42e-05
central nervous system development (GO:0007417)	267	18	5.28	+	3.41	1.15e-05	0.000955
developmental maturation (GO:0021700)	210	13	4.15	+	3.13	0.000418	0.0228
cuticle development (GO:0042335)	259	16	5.12	+	3.12	9.44e-05	0.00621
negative regulation of nucleobase-containing compound metabolic process (GO:0045934)	389	23	7.69	+	2.99	5.54e-06	0.000539
regulation of organelle organization (GO:0033043)	412	24	8.15	+	2.95	4.37e-06	0.000443
negative regulation of macromolecule biosynthetic process (GO:0010558)	414	24	8.19	+	2.93	4.73e-06	0.000472
negative regulation of cellular macromolecule biosynthetic process (GO:2000113)	414	24	8.19	+	2.93	4.73e-06	0.000466
negative regulation of RNA biosynthetic process (GO:1902679)	348	20	6.88	+	2.91	3.37e-05	0.00257
negative regulation of transcription, DNA-templated (GO:0045892)	348	20	6.88	+	2.91	3.37e-05	0.00254
negative regulation of nucleic acid-templated transcription (GO:1903507)	348	20	6.88	+	2.91	3.37e-05	0.00252
microtubule-based process (GO:0007017)	471	27	9.31	+	2.9	1.43e-06	0.000157
cellular process involved in reproduction in multicellular organism (GO:0022412)	879	50	17.38	+	2.88	3.17e-11	1.28e-08
negative regulation of cellular biosynthetic process (GO:0031327)	425	24	8.4	+	2.86	7.2e-06	0.000675
negative regulation of biosynthetic process (GO:0009890)	425	24	8.4	+	2.86	7.2e-06	0.000667
female gamete generation (GO:0007292)	680	38	13.44	+	2.83	1.6e-08	2.74e-06
gamete generation (GO:0007276)	946	52	18.7	+	2.78	3.94e-11	1.44e-08
negative regulation of RNA metabolic process (GO:0051253)	367	20	7.26	+	2.76	6.81e-05	0.00456
male gamete generation (GO:0048232)	297	16	5.87	+	2.72	0.000411	0.0226
cytoskeleton organization (GO:0007010)	578	30	11.43	+	2.63	2.53e-06	0.000267
negative regulation of gene expression (GO:0010629)	551	28	10.89	+	2.57	8.15e-06	0.000729
cellular response to stress (GO:0033554)	515	26	10.18	+	2.55	1.94e-05	0.00156
organelle organization (GO:0006996)	1731	86	34.22	+	2.51	5.08e-16	7.82e-13
embryo development (GO:0009790)	526	26	10.4	+	2.5	4.37e-05	0.00317
oogenesis (GO:0048477)	613	30	12.12	+	2.48	1.02e-05	0.000884
developmental process involved in reproduction (GO:0003006)	836	40	16.53	+	2.42	3.69e-07	4.51e-05
regulation of RNA biosynthetic process (GO:2001141)	1153	55	22.8	+	2.41	2.03e-09	5.03e-07
regulation of transcription, DNA-templated (GO:0006355)	1153	55	22.8	+	2.41	2.03e-09	4.87e-07
regulation of nucleic acid-templated transcription (GO:1903506)	1153	55	22.8	+	2.41	2.03e-09	4.72e-07
negative regulation of cellular metabolic process (GO:0031324)	612	29	12.1	+	2.4	2.23e-05	0.00173
negative regulation of nitrogen compound metabolic process (GO:0051172)	572	27	11.31	+	2.39	4.73e-05	0.0034
regulation of cellular macromolecule biosynthetic process (GO:2000112)	1302	61	25.74	+	2.37	3.27e-10	1.01e-07
reproductive process (GO:0022414)	1238	58	24.48	+	2.37	1.02e-09	2.63e-07
regulation of transcription by RNA polymerase II (GO:0006357)	705	33	13.94	+	2.37	6.79e-06	0.000645
regulation of macromolecule biosynthetic process (GO:0010556)	1308	61	25.86	+	2.36	3.84e-10	1.14e-07
multicellular organismal reproductive process (GO:0048609)	1117	52	22.09	+	2.35	1.15e-08	2.22e-06
germ cell development (GO:0007281)	734	34	14.51	+	2.34	8.98e-06	0.000794
sexual reproduction (GO:0019953)	1125	52	22.24	+	2.34	1.41e-08	2.52e-06
multi-organism reproductive process (GO:0044703)	1126	52	22.26	+	2.34	1.44e-08	2.52e-06
regulation of cellular biosynthetic process (GO:0031326)	1350	62	26.69	+	2.32	5.69e-10	1.56e-07
regulation of biosynthetic process (GO:0009889)	1353	62	26.75	+	2.32	6.03e-10	1.6e-07
regulation of gene expression (GO:0010468)	1529	70	30.23	+	2.32	2.91e-11	1.25e-08
negative regulation of metabolic process (GO:0009892)	749	34	14.81	+	2.3	1.11e-05	0.000936
negative regulation of macromolecule metabolic process (GO:0010605)	705	32	13.94	+	2.3	2.22e-05	0.00175
regulation of RNA metabolic process (GO:0051252)	1271	56	25.13	+	2.23	2.24e-08	3.45e-06
regulation of nucleobase-containing compound metabolic process (GO:0019219)	1328	58	26.26	+	2.21	1.34e-08	2.46e-06
multicellular organism reproduction (GO:0032504)	1332	57	26.34	+	2.16	4.61e-08	6.7e-06
anatomical structure formation involved in morphogenesis (GO:0048646)	538	23	10.64	+	2.16	0.000766	0.0393
negative regulation of cellular process (GO:0048523)	1193	51	23.59	+	2.16	2.34e-07	2.91e-05
reproduction (GO:0000003)	1451	62	28.69	+	2.16	8.33e-09	1.69e-06
animal organ development (GO:0048513)	1180	50	23.33	+	2.14	3.96e-07	4.68e-05
negative regulation of biological process (GO:0048519)	1394	58	27.56	+	2.1	8.92e-08	1.23e-05
multi-organism process (GO:0051704)	1438	59	28.43	+	2.08	8.48e-08	1.19e-05
regulation of macromolecule metabolic process (GO:0060255)	1957	80	38.69	+	2.07	1.7e-10	5.95e-08
multicellular organism development (GO:0007275)	2309	93	45.65	+	2.04	5.47e-12	3.83e-09
regulation of metabolic process (GO:0019222)	2091	83	41.34	+	2.01	2.95e-10	9.46e-08
regulation of nitrogen compound metabolic process (GO:0051171)	1841	73	36.4	+	2.01	5.95e-09	1.31e-06
cell development (GO:0048468)	1328	52	26.26	+	1.98	2.56e-06	0.000266
regulation of cellular component organization (GO:0051128)	792	31	15.66	+	1.98	0.000363	0.0205
regulation of primary metabolic process (GO:0080090)	1857	72	36.72	+	1.96	2.03e-08	3.18e-06
regulation of cellular metabolic process (GO:0031323)	1912	74	37.8	+	1.96	1.72e-08	2.82e-06
anatomical structure development (GO:0048856)	2680	103	52.99	+	1.94	5.02e-12	3.87e-09
cellular component organization (GO:0016043)	2607	100	51.54	+	1.94	1.02e-11	5.58e-09
system development (GO:0048731)	1688	64	33.37	+	1.92	3.78e-07	4.54e-05
developmental process (GO:0032502)	2769	104	54.75	+	1.9	1.05e-11	5.37e-09
nucleic acid metabolic process (GO:0090304)	1077	40	21.29	+	1.88	0.000154	0.00964
positive regulation of cellular process (GO:0048522)	1307	48	25.84	+	1.86	4.12e-05	0.00302
nervous system development (GO:0007399)	1065	39	21.06	+	1.85	0.000234	0.0139
cellular component organization or biogenesis (GO:0071840)	2735	100	54.08	+	1.85	1.96e-10	6.54e-08
cell differentiation (GO:0030154)	1677	61	33.16	+	1.84	3.85e-06	0.000395
cellular developmental process (GO:0048869)	1719	61	33.99	+	1.79	7.7e-06	0.000697
positive regulation of biological process (GO:0048518)	1464	50	28.95	+	1.73	0.000154	0.00971
regulation of biological process (GO:0050789)	3842	131	75.96	+	1.72	2.98e-12	2.55e-09
regulation of cellular process (GO:0050794)	3540	118	69.99	+	1.69	4.88e-10	1.39e-07
biological regulation (GO:0065007)	4297	139	84.96	+	1.64	2.32e-11	1.05e-08
multicellular organismal process (GO:0032501)	3583	115	70.84	+	1.62	1.22e-08	2.3e-06
cellular macromolecule metabolic process (GO:0044260)	2200	67	43.5	+	1.54	0.000316	0.0181
cellular process (GO:0009987)	6675	163	131.98	+	1.24	0.000226	0.0135
system process (GO:0003008)	723	3	14.29	-	0.21	0.00073	0.0377
transmembrane transport (GO:0055085)	590	1	11.67	-	0.09	0.000182	0.0111
GO cellular component complete	Drosophila melanogaster - REFLIST (13757)	upload_1 (272)	upload_1 (expected)	upload_1 (over/under)	upload_1 (fold Enrichment)	upload_1 (raw P-value)	upload_1 (FDR)
alpha DNA polymerase:primase complex (GO:0005658)	4	3	0.08	+	37.93	0.000238	0.00564
condensin complex (GO:0000796)	7	4	0.14	+	28.9	4.1e-05	0.00123
nuclear replisome (GO:0043601)	10	4	0.2	+	20.23	0.000119	0.0032
replisome (GO:0030894)	10	4	0.2	+	20.23	0.000119	0.00314
pericentriolar material (GO:0000242)	13	4	0.26	+	15.56	0.00027	0.00616
aster (GO:0005818)	11	3	0.22	+	13.79	0.00224	0.0408
centriole (GO:0005814)	28	7	0.55	+	12.64	4.03e-06	0.000133
polytene chromosome chromocenter (GO:0005701)	17	4	0.34	+	11.9	0.000638	0.0137
replication fork (GO:0005657)	32	7	0.63	+	11.06	8.62e-06	0.000271
condensed chromosome (GO:0000793)	70	15	1.38	+	10.84	7.47e-11	5.6e-09
PcG protein complex (GO:0031519)	29	6	0.57	+	10.46	5.09e-05	0.00146
nuclear replication fork (GO:0043596)	20	4	0.4	+	10.12	0.00108	0.0218
chromocenter (GO:0010369)	25	5	0.49	+	10.12	0.000253	0.00588
microtubule organizing center part (GO:0044450)	52	10	1.03	+	9.73	2.81e-07	1.12e-05
chromosome, telomeric region (GO:0000781)	34	6	0.67	+	8.93	0.000111	0.00305
condensed chromosome, centromeric region (GO:0000779)	23	4	0.45	+	8.8	0.00171	0.032
condensed nuclear chromosome (GO:0000794)	36	6	0.71	+	8.43	0.000147	0.00373
DNA packaging complex (GO:0044815)	24	4	0.47	+	8.43	0.00196	0.0362
chromosome, centromeric region (GO:0000775)	86	14	1.7	+	8.23	7.57e-09	3.93e-07
kinesin complex (GO:0005871)	33	5	0.65	+	7.66	0.000785	0.0163
spindle microtubule (GO:0005876)	34	5	0.67	+	7.44	0.000887	0.0181
kinetochore (GO:0000776)	50	7	0.99	+	7.08	0.00011	0.00309
spindle pole (GO:0000922)	36	5	0.71	+	7.02	0.00112	0.0222
heterochromatin (GO:0000792)	51	7	1.01	+	6.94	0.000123	0.00319
nuclear periphery (GO:0034399)	39	5	0.77	+	6.48	0.00155	0.0298
chromosomal region (GO:0098687)	199	25	3.93	+	6.35	1.52e-12	1.46e-10
spindle (GO:0005819)	109	13	2.16	+	6.03	6.87e-07	2.65e-05
centrosome (GO:0005813)	110	13	2.17	+	5.98	7.55e-07	2.75e-05
microtubule organizing center (GO:0005815)	149	17	2.95	+	5.77	2.35e-08	1.09e-06
chromosomal part (GO:0044427)	472	51	9.33	+	5.46	4.31e-22	1.94e-19
nuclear chromosome part (GO:0044454)	225	24	4.45	+	5.39	9.81e-11	6.97e-09
chromatin (GO:0000785)	282	29	5.58	+	5.2	2.24e-12	2.02e-10
extracellular matrix (GO:0031012)	150	15	2.97	+	5.06	7.54e-07	2.83e-05
chromosome (GO:0005694)	568	56	11.23	+	4.99	1.7e-22	1.15e-19
nuclear chromosome (GO:0000228)	257	24	5.08	+	4.72	1.17e-09	7.2e-08
microtubule (GO:0005874)	97	9	1.92	+	4.69	0.000216	0.0052
nuclear chromatin (GO:0000790)	161	14	3.18	+	4.4	7.96e-06	0.000256
polytene chromosome (GO:0005700)	200	17	3.95	+	4.3	1.13e-06	3.81e-05
microtubule cytoskeleton (GO:0015630)	328	26	6.49	+	4.01	5.79e-09	3.13e-07
microtubule associated complex (GO:0005875)	129	9	2.55	+	3.53	0.00147	0.0288
cytoskeletal part (GO:0044430)	429	29	8.48	+	3.42	2.09e-08	1.01e-06
cytoskeleton (GO:0005856)	490	31	9.69	+	3.2	2.78e-08	1.25e-06
intracellular non-membrane-bounded organelle (GO:0043232)	1464	85	28.95	+	2.94	7.76e-20	2.62e-17
non-membrane-bounded organelle (GO:0043228)	1464	85	28.95	+	2.94	7.76e-20	2.09e-17
nuclear lumen (GO:0031981)	960	52	18.98	+	2.74	6.57e-11	5.21e-09
nucleus (GO:0005634)	2564	133	50.69	+	2.62	7.24e-29	9.76e-26
nucleoplasm part (GO:0044451)	394	20	7.79	+	2.57	0.00017	0.00424
transferase complex (GO:1990234)	513	26	10.14	+	2.56	1.82e-05	0.000559
nuclear part (GO:0044428)	1298	64	25.66	+	2.49	1.28e-11	1.08e-09
organelle lumen (GO:0043233)	1158	52	22.9	+	2.27	3.92e-08	1.71e-06
intracellular organelle lumen (GO:0070013)	1158	52	22.9	+	2.27	3.92e-08	1.65e-06
membrane-enclosed lumen (GO:0031974)	1158	52	22.9	+	2.27	3.92e-08	1.6e-06
nucleoplasm (GO:0005654)	607	26	12	+	2.17	0.000299	0.00672
intracellular organelle part (GO:0044446)	2884	114	57.02	+	2	1.8e-14	2.43e-12
organelle part (GO:0044422)	2954	114	58.41	+	1.95	6.73e-14	8.26e-12
intracellular organelle (GO:0043229)	4954	173	97.95	+	1.77	1.09e-19	2.46e-17
protein-containing complex (GO:0032991)	2729	95	53.96	+	1.76	9.96e-09	4.97e-07
organelle (GO:0043226)	5042	174	99.69	+	1.75	1.82e-19	3.5e-17
catalytic complex (GO:1902494)	1017	35	20.11	+	1.74	0.00156	0.0296
intracellular membrane-bounded organelle (GO:0043231)	4195	141	82.94	+	1.7	5.37e-13	5.57e-11
membrane-bounded organelle (GO:0043227)	4422	147	87.43	+	1.68	2.54e-13	2.86e-11
intracellular part (GO:0044424)	6108	190	120.77	+	1.57	6.31e-17	1.06e-14
intracellular (GO:0005622)	6130	190	121.2	+	1.57	1.1e-16	1.64e-14
cell (GO:0005623)	7128	194	140.93	+	1.38	1.11e-10	7.49e-09
cell part (GO:0044464)	7128	194	140.93	+	1.38	1.11e-10	7.13e-09
cellular_component (GO:0005575)	10547	233	208.53	+	1.12	0.000352	0.00767
Unclassified (UNCLASSIFIED)	3210	39	63.47	-	0.61	0.000352	0.00779
plasma membrane (GO:0005886)	1209	9	23.9	-	0.38	0.000661	0.0139
membrane (GO:0016020)	2655	17	52.49	-	0.32	1.76e-09	1.03e-07
plasma membrane part (GO:0044459)	810	5	16.02	-	0.31	0.00233	0.0419
membrane part (GO:0044425)	1986	9	39.27	-	0.23	2.22e-09	1.25e-07
integral component of membrane (GO:0016021)	1371	6	27.11	-	0.22	9.26e-07	3.29e-05
intrinsic component of membrane (GO:0031224)	1392	6	27.52	-	0.22	9.66e-07	3.34e-05
mitochondrion (GO:0005739)	774	2	15.3	-	0.13	4.23e-05	0.00124
mitochondrial part (GO:0044429)	463	0	9.15	-	< 0.01	0.000201	0.00493
GO molecular function complete	Drosophila melanogaster - REFLIST (13757)	upload_1 (272)	upload_1 (expected)	upload_1 (over/under)	upload_1 (fold Enrichment)	upload_1 (raw P-value)	upload_1 (FDR)
four-way junction helicase activity (GO:0009378)	4	3	0.08	+	37.93	0.000238	0.0194
DNA-directed DNA polymerase activity (GO:0003887)	17	4	0.34	+	11.9	0.000638	0.0465
DNA polymerase activity (GO:0034061)	18	4	0.36	+	11.24	0.000768	0.0495
ATP-dependent DNA helicase activity (GO:0004003)	25	5	0.49	+	10.12	0.000253	0.0195
DNA helicase activity (GO:0003678)	40	6	0.79	+	7.59	0.000246	0.0194
single-stranded DNA binding (GO:0003697)	45	6	0.89	+	6.74	0.000435	0.0326
catalytic activity, acting on DNA (GO:0140097)	110	13	2.17	+	5.98	7.55e-07	0.000209
chromatin binding (GO:0003682)	195	23	3.86	+	5.97	3.94e-11	1.82e-08
structural constituent of chitin-based larval cuticle (GO:0008010)	103	11	2.04	+	5.4	1.31e-05	0.00213
proximal promoter sequence-specific DNA binding (GO:0000987)	102	10	2.02	+	4.96	6.33e-05	0.00605
tubulin binding (GO:0015631)	148	14	2.93	+	4.78	3.24e-06	0.000598
structural constituent of cuticle (GO:0042302)	139	13	2.75	+	4.73	8.17e-06	0.00141
microtubule binding (GO:0008017)	129	12	2.55	+	4.7	1.92e-05	0.00279
structural constituent of chitin-based cuticle (GO:0005214)	132	12	2.61	+	4.6	2.37e-05	0.00298
transcription factor activity, RNA polymerase II proximal promoter sequence-specific DNA binding (GO:0000982)	133	11	2.63	+	4.18	0.000114	0.0105
double-stranded DNA binding (GO:0003690)	341	24	6.74	+	3.56	1.85e-07	5.7e-05
sequence-specific double-stranded DNA binding (GO:1990837)	307	21	6.07	+	3.46	1.71e-06	0.000395
DNA binding (GO:0003677)	870	58	17.2	+	3.37	8.62e-16	1.19e-12
transcription regulatory region sequence-specific DNA binding (GO:0000976)	282	18	5.58	+	3.23	2.3e-05	0.00304
regulatory region nucleic acid binding (GO:0001067)	323	19	6.39	+	2.98	3.95e-05	0.00456
transcription regulatory region DNA binding (GO:0044212)	323	19	6.39	+	2.98	3.95e-05	0.00438
cytoskeletal protein binding (GO:0008092)	326	18	6.45	+	2.79	0.000135	0.0121
zinc ion binding (GO:0008270)	510	28	10.08	+	2.78	2.02e-06	0.00043
nucleic acid binding (GO:0003676)	1616	80	31.95	+	2.5	9.84e-15	9.09e-12
DNA binding transcription factor activity (GO:0003700)	483	23	9.55	+	2.41	0.000179	0.0155
sequence-specific DNA binding (GO:0043565)	494	23	9.77	+	2.35	0.000221	0.0186
transcription regulator activity (GO:0140110)	635	29	12.56	+	2.31	6.17e-05	0.00611
transition metal ion binding (GO:0046914)	707	31	13.98	+	2.22	4.77e-05	0.00509
ATP binding (GO:0005524)	636	26	12.57	+	2.07	0.000691	0.0479
metal ion binding (GO:0046872)	1031	42	20.38	+	2.06	1.36e-05	0.00209
adenyl ribonucleotide binding (GO:0032559)	640	26	12.65	+	2.05	0.000726	0.0491
adenyl nucleotide binding (GO:0030554)	644	26	12.73	+	2.04	0.000766	0.0505
cation binding (GO:0043169)	1059	42	20.94	+	2.01	1.98e-05	0.00274
protein binding (GO:0005515)	2290	89	45.28	+	1.97	1.47e-10	5.82e-08
heterocyclic compound binding (GO:1901363)	2600	100	51.41	+	1.95	9.19e-12	6.37e-09
drug binding (GO:0008144)	809	31	16	+	1.94	0.000643	0.0457
organic cyclic compound binding (GO:0097159)	2618	100	51.76	+	1.93	1.76e-11	9.77e-09
ion binding (GO:0043167)	2050	71	40.53	+	1.75	2.02e-06	0.0004
binding (GO:0005488)	5233	179	103.47	+	1.73	8.41e-20	2.33e-16
transmembrane transporter activity (GO:0022857)	706	0	13.96	-	< 0.01	1.58e-06	0.000398
ion transmembrane transporter activity (GO:0015075)	537	0	10.62	-	< 0.01	3.91e-05	0.00472
transporter activity (GO:0005215)	811	0	16.03	-	< 0.01	1.24e-07	4.28e-05
inorganic molecular entity transmembrane transporter activity (GO:0015318)	514	0	10.16	-	< 0.01	5.84e-05	0.00599

## Sheet: Supplemental Table 10
Supplemental Table 8: Gene Ontology term enrichment for genes differentially expressed by all three species in reponse to L-DOPA compated to control food.
Analysis Type:	PANTHER Overrepresentation Test (Released 20171205)
Annotation Version and Release Date:	GO Ontology database Released 2018-05-21
Analyzed List:	upload_1 (Drosophila melanogaster)
Reference List:	Drosophila melanogaster (all genes in database)
Test Type:	FISHER
GO biological process complete	Drosophila melanogaster - REFLIST (13757)	upload_1 (18)	upload_1 (expected)	upload_1 (over/under)	upload_1 (fold Enrichment)	upload_1 (raw P-value)	upload_1 (FDR)
vitelline membrane formation involved in chorion-containing eggshell formation (GO:0007305)	13	4	0.02	+	> 100	4.81e-09	3.7e-05
vitelline membrane formation (GO:0030704)	13	4	0.02	+	> 100	4.81e-09	1.85e-05
egg coat formation (GO:0035803)	13	4	0.02	+	> 100	4.81e-09	1.23e-05
extracellular matrix assembly (GO:0085029)	16	4	0.02	+	> 100	9.76e-09	1.88e-05
extracellular matrix organization (GO:0030198)	57	4	0.07	+	53.63	1.02e-06	0.00156
extracellular structure organization (GO:0043062)	73	4	0.1	+	41.88	2.6e-06	0.00334
chorion-containing eggshell formation (GO:0007304)	119	4	0.16	+	25.69	1.68e-05	0.0185
eggshell formation (GO:0030703)	121	4	0.16	+	25.27	1.79e-05	0.0172
cellular component assembly involved in morphogenesis (GO:0010927)	141	4	0.18	+	21.68	3.21e-05	0.0275
GO cellular component complete	Drosophila melanogaster - REFLIST (13757)	upload_1 (18)	upload_1 (expected)	upload_1 (over/under)	upload_1 (fold Enrichment)	upload_1 (raw P-value)	upload_1 (FDR)
egg coat (GO:0035805)	6	4	0.01	+	> 100	4.26e-10	5.75e-07
vitelline envelope (GO:0060388)	5	3	0.01	+	> 100	1.04e-07	7.05e-05
external encapsulating structure (GO:0030312)	45	4	0.06	+	67.94	4.17e-07	0.000187
GO molecular function complete	Drosophila melanogaster - REFLIST (13757)	upload_1 (18)	upload_1 (expected)	upload_1 (over/under)	upload_1 (fold Enrichment)	upload_1 (raw P-value)	upload_1 (FDR)
structural constituent of egg coat (GO:0035804)	3	2	0	+	> 100	1.61e-05	0.0149
structural constituent of vitelline membrane (GO:0008316)	3	2	0	+	> 100	1.61e-05	0.0111
hydrolase activity, acting on glycosyl bonds (GO:0016798)	99	5	0.13	+	38.6	1.76e-07	0.000489
hydrolase activity, hydrolyzing O-glycosyl compounds (GO:0004553)	91	4	0.12	+	33.59	6.03e-06	0.00836
